# Supplementary material for: Determining Streptococcus suis serotype from short-read whole-genome sequencing data
Source: Springer Nature journal article supplement (doi:10.1186/s12866-016-0782-8), 2016-07-22
Supplement: 12866_2016_782_MOESM1_ESM.pdf [file 12866_2016_782_MOESM1_ESM.pdf]

## **Supplementary Materials:**

This supplementary file contains: 1) three supplementary Tables, 2) 26 supplementary Figures.

**Table S1. *Streptococcus suis* strains used in this study.**

| Strain  | Origin | Serotype          |          | Sequence Type <sup>b</sup> | <i>aroA</i> | <i>cpn60</i> | <i>dpr</i> | <i>gki</i> | <i>mutS</i> | <i>recA</i> | <i>thrA</i> | <i>mrp</i> | <i>epf</i> | <i>sly</i> | <i>recN</i> | Illumina Sequence Data  |          | SRA Accession N <sup>o</sup> |
|---------|--------|-------------------|----------|----------------------------|-------------|--------------|------------|------------|-------------|-------------|-------------|------------|------------|------------|-------------|-------------------------|----------|------------------------------|
|         |        | Coag <sup>a</sup> | Pipeline |                            |             |              |            |            |             |             |             |            |            |            |             | N <sup>o</sup> of Reads | Coverage |                              |
| NSUI117 | Canada | 1                 | 1        | 1                          | 1           | 1            | 1          | 1          | 1           | 1           | 1           | +          | +          | +          | +           | 916,102                 | 52.05    | SRR3066639                   |
| NSUI118 | Canada | 1                 | 1        | 1                          | 1           | 1            | 1          | 1          | 1           | 1           | 1           | +          | +          | +          | +           | 820,660                 | 46.63    | SRR3066640                   |
| NSUI119 | Canada | 1                 | 1        | 1                          | 1           | 1            | 1          | 1          | 1           | 1           | 1           | +          | +          | +          | +           | 851,154                 | 48.36    | SRR3066736                   |
| NSUI120 | Canada | 1                 | 1        | 13                         | 1           | 12           | 1          | 1          | 6           | 21          | 21          | -          | -          | +          | +           | 803,916                 | 45.68    | SRR3066747                   |
| NSUI121 | Canada | 1                 | 1        | 1                          | 1           | 1            | 1          | 1          | 1           | 1           | 1           | +          | +          | +          | +           | 982,266                 | 55.81    | SRR3066758                   |
| NSUI122 | Canada | 1                 | 1        | 1                          | 1           | 1            | 1          | 1          | 1           | 1           | 1           | +          | +          | +          | +           | 795,544                 | 45.20    | SRR3066769                   |
| NSUI123 | Canada | 1                 | 1        | 1                          | 1           | 1            | 1          | 1          | 1           | 1           | 1           | +          | +          | +          | +           | 1,009,884               | 57.38    | SRR3066780                   |
| NSUI124 | Canada | 1/2               | 1/2      | 28                         | 2           | 30           | 5          | 34         | 31          | 3           | 25          | +          | -          | -          | +           | 901,988                 | 51.25    | SRR3066791                   |
| NSUI125 | Canada | 1/2               | 1/2      | 28                         | 2           | 30           | 5          | 34         | 31          | 3           | 25          | +          | -          | -          | +           | 1,164,954               | 66.19    | SRR3066802                   |
| NSUI126 | Canada | 1/2               | 1/2      | 28                         | 2           | 30           | 5          | 34         | 31          | 3           | 25          | +          | -          | -          | +           | 945,366                 | 53.71    | SRR3066813                   |
| NSUI127 | Canada | 1/2               | 1/2      | 28                         | 2           | 30           | 5          | 34         | 31          | 3           | 25          | +          | -          | -          | +           | 1,038,676               | 59.02    | SRR3066641                   |
| NSUI128 | Canada | 1/2               | 1/2      | 28                         | 2           | 30           | 5          | 34         | 31          | 3           | 25          | +          | -          | -          | +           | 987,342                 | 56.10    | SRR3066684                   |
| NSUI129 | Canada | 1/2               | 1/2      | 28                         | 2           | 30           | 5          | 34         | 31          | 3           | 25          | +          | -          | -          | +           | 655,476                 | 37.24    | SRR3066727                   |
| NSUI130 | Canada | 1/2               | 1/2      | 28                         | 2           | 30           | 5          | 34         | 31          | 3           | 25          | +          | -          | -          | +           | 755,072                 | 42.90    | SRR3066729                   |
| NSUI131 | Canada | 2                 | 2        | 25                         | 9           | 30           | 5          | 34         | 30          | 3           | 25          | +          | -          | -          | +           | 915,430                 | 52.01    | SRR3066730                   |
| NSUI132 | Canada | 2                 | 2        | 25                         | 9           | 30           | 5          | 34         | 30          | 3           | 25          | +          | -          | -          | +           | 765,442                 | 43.49    | SRR3066731                   |
| NSUI133 | Canada | 2                 | 2        | 28                         | 2           | 30           | 5          | 34         | 31          | 3           | 25          | +          | -          | -          | +           | 1,171,864               | 66.58    | SRR3066732                   |
| NSUI134 | Canada | 2                 | 2        | 28                         | 2           | 30           | 5          | 34         | 31          | 3           | 25          | +          | -          | -          | +           | 1,149,098               | 65.29    | SRR3066733                   |
| NSUI135 | Canada | 2                 | 2        | 25                         | 9           | 30           | 5          | 34         | 30          | 3           | 25          | +          | -          | -          | +           | 1,315,186               | 74.73    | SRR3066734                   |
| NSUI136 | Canada | 2                 | 2        | 28                         | 2           | 30           | 5          | 34         | 31          | 3           | 25          | +          | -          | -          | +           | 936,940                 | 53.24    | SRR3066735                   |
| NSUI137 | Canada | 2                 | 2        | 25                         | 9           | 30           | 5          | 34         | 30          | 3           | 25          | +          | -          | -          | +           | 919,264                 | 52.23    | SRR3066737                   |
| NSUI138 | Canada | 3                 | 3        | 108                        | 8           | 21           | 5          | 45         | 44          | 22          | 23          | +          | -          | +          | +           | 1,010,030               | 57.39    | SRR3066738                   |
| NSUI139 | Canada | 3                 | 3        | Novel <sup>c</sup>         | 8           | 21           | 5          | 34         | 44          | 22          | 23          | +          | -          | +          | +           | 795,330                 | 45.19    | SRR3066739                   |
| NSUI140 | Canada | 3                 | 3        | 117                        | 31          | 57           | 5          | 34         | 31          | 3           | 25          | +          | -          | -          | +           | 990,586                 | 56.28    | SRR3066740                   |
| NSUI141 | Canada | 3                 | 3        | 27                         | 31          | 30           | 5          | 34         | 31          | 3           | 25          | +          | -          | -          | +           | 967,290                 | 54.96    | SRR3066741                   |
| NSUI142 | Canada | 3                 | 3        | 27                         | 31          | 30           | 5          | 34         | 31          | 3           | 25          | +          | -          | -          | +           | 1,082,054               | 61.48    | SRR3066742                   |
| NSUI143 | Canada | 4                 | 4        | 94                         | 8           | 21           | 5          | 45         | 44          | 22          | 4           | +          | -          | +          | +           | 1,118,392               | 63.55    | SRR3066743                   |
| NSUI144 | Canada | 4                 | 4        | Novel                      | 8           | 21           | 5          | 45         | 44          | 22          | 109         | +          | -          | +          | +           | 897,722                 | 51.01    | SRR3066744                   |
| NSUI145 | Canada | 4                 | 4        | 94                         | 8           | 21           | 5          | 45         | 44          | 22          | 4           | +          | -          | +          | +           | 803,550                 | 45.66    | SRR3066745                   |
| NSUI146 | Canada | 4                 | 4        | Novel                      | 91          | 21           | 5          | 45         | 44          | 22          | 23          | +          | -          | +          | +           | 805,218                 | 45.75    | SRR3066746                   |
| NSUI147 | Canada | 4                 | 4        | 94                         | 8           | 21           | 5          | 45         | 44          | 22          | 4           | +          | -          | +          | +           | 1,032,564               | 58.67    | SRR3066748                   |

| Strain  | Origin | Serotype          |                     | Sequence Type <sup>b</sup> | <i>aroA</i> | <i>cpn60</i> | <i>dpr</i> | <i>gki</i> | <i>mutS</i> | <i>recA</i> | <i>thrA</i> | <i>mrp</i> | <i>epf</i> | <i>sly</i> | <i>recN</i> | Illumina Sequence Data  |          | SRA Accession N <sup>o</sup> |
|---------|--------|-------------------|---------------------|----------------------------|-------------|--------------|------------|------------|-------------|-------------|-------------|------------|------------|------------|-------------|-------------------------|----------|------------------------------|
|         |        | Coag <sup>a</sup> | Pipeline            |                            |             |              |            |            |             |             |             |            |            |            |             | N <sup>o</sup> of Reads | Coverage |                              |
|         |        |                   |                     |                            |             |              |            |            |             |             |             |            |            |            |             |                         |          |                              |
| NSUI148 | Canada | 4                 | 4                   | 108                        | 8           | 21           | 5          | 45         | 44          | 22          | 23          | +          | -          | +          | +           | 850,902                 | 48.35    | SRR3066749                   |
| NSUI149 | Canada | 4                 | 4                   | 94                         | 8           | 21           | 5          | 45         | 44          | 22          | 4           | +          | -          | +          | +           | 1,023,312               | 58.14    | SRR3066750                   |
| NSUI150 | Canada | 5                 | 5                   | 94                         | 8           | 21           | 5          | 45         | 44          | 22          | 4           | +          | -          | +          | +           | 1,036,942               | 58.92    | SRR3066751                   |
| NSUI151 | Canada | 5                 | 5                   | 89                         | 8           | 8            | 24         | 12         | 1           | 10          | 4           | +          | -          | +          | +           | 769,192                 | 43.70    | SRR3066752                   |
| NSUI152 | Canada | 5                 | 5                   | 53                         | 8           | 6            | 18         | 20         | 28          | 7           | 5           | +          | -          | +          | +           | 897,458                 | 50.99    | SRR3066753                   |
| NSUI153 | Canada | 5                 | 5                   | 235                        | 57          | 76           | 53         | 6          | 98          | 15          | 76          | -          | -          | -          | +           | 846,396                 | 48.09    | SRR3066754                   |
| NSUI154 | Canada | 5                 | 5                   | Novel                      | 38          | 28           | 85         | 4          | 84          | 26          | 11          | -          | -          | -          | +           | 1,006,304               | 57.18    | SRR3066755                   |
| NSUI155 | Canada | 5                 | 5                   | Novel                      | 38          | 28           | 85         | 4          | 84          | 26          | 49          | -          | -          | -          | +           | 1,111,124               | 63.13    | SRR3066756                   |
| NSUI156 | Canada | 5                 | 5                   | Novel                      | 8           | 21           | 5          | 45         | 44          | 22          | 109         | +          | -          | +          | +           | 1,190,748               | 67.66    | SRR3066757                   |
| NSUI157 | Canada | 6                 | 6                   | 55                         | 25          | 37           | 15         | 41         | 15          | 23          | 10          | -          | -          | -          | +           | 1,064,592               | 60.49    | SRR3066759                   |
| NSUI158 | Canada | 7                 | 7                   | 89                         | 8           | 8            | 24         | 12         | 1           | 10          | 4           | +          | -          | +          | +           | 954,670                 | 54.24    | SRR3066760                   |
| NSUI159 | Canada | 7                 | 7                   | 225                        | 8           | 30           | 5          | 34         | 44          | 21          | 4           | -          | -          | +          | +           | 1,035,986               | 58.86    | SRR3066761                   |
| NSUI160 | Canada | 7                 | 7                   | 89                         | 8           | 8            | 24         | 12         | 1           | 10          | 4           | +          | -          | +          | +           | 727,734                 | 41.35    | SRR3066762                   |
| NSUI161 | Canada | 7                 | 7                   | 94                         | 8           | 21           | 5          | 45         | 44          | 22          | 4           | +          | -          | +          | +           | 789,048                 | 44.83    | SRR3066763                   |
| NSUI162 | Canada | 7                 | 7                   | 94                         | 8           | 21           | 5          | 45         | 44          | 22          | 4           | +          | -          | +          | +           | 1,034,780               | 58.79    | SRR3066764                   |
| NSUI163 | Canada | 7                 | 7                   | Novel                      | 8           | 21           | 5          | 45         | 44          | 22          | 109         | +          | -          | +          | +           | 872,236                 | 49.56    | SRR3066765                   |
| NSUI164 | Canada | 7                 | 7                   | 32                         | 8           | 30           | 5          | 34         | 30          | 21          | 4           | -          | -          | +          | +           | 775,384                 | 44.06    | SRR3066766                   |
| NSUI165 | Canada | 8                 | NT <sup>d</sup> (8) | LC <sup>e</sup> (87)       | 18          | 8            | 24         | LC         | 1           | 10          | 4           | +          | -          | +          | +           | 337,516                 | 19.18    | SRR3066767 <sup>f</sup>      |
|         |        |                   |                     |                            |             |              |            | (12)       |             |             |             |            |            |            |             |                         |          |                              |
| NSUI166 | Canada | 8                 | 8                   | 87                         | 18          | 8            | 24         | 12         | 1           | 10          | 4           | +          | -          | +          | +           | 561,586                 | 31.91    | SRR3066768                   |
| NSUI167 | Canada | 8                 | 8                   | LC (87)                    | 18          | 8            | LC         | 12         | 1           | 10          | 4           | +          | -          | +          | +           | 350,536                 | 19.92    | SRR3066770                   |
|         |        |                   |                     |                            |             |              |            | (24)       |             |             |             |            |            |            |             |                         |          |                              |
| NSUI168 | Canada | 8                 | 8                   | LC (87)                    | LC          | LC           | 24         | 12         | 1           | LC          | 4           | +          | -          | +          | +           | 215,674                 | 12.25    | SRR3066771                   |
|         |        |                   |                     |                            | (18)        | (8)          |            |            |             | (10)        |             |            |            |            |             |                         |          |                              |
| NSUI170 | Canada | 8                 | 8                   | 87                         | 18          | 8            | 24         | 12         | 1           | 10          | 4           | +          | -          | +          | +           | 736,500                 | 41.85    | SRR3066772                   |
| NSUI171 | Canada | 8                 | 8                   | 87                         | 18          | 8            | 24         | 12         | 1           | 10          | 4           | +          | -          | +          | +           | 600,254                 | 34.11    | SRR3066773                   |
| NSUI172 | Canada | 9                 | 9                   | Novel                      | 48          | 33           | 30         | 66         | 48          | 55          | 76          | +          | -          | -          | +           | 531,790                 | 30.22    | SRR3066774                   |
| NSUI173 | Canada | 9                 | 9                   | Novel                      | 17          | 21           | 5          | 45         | 44          | 22          | 25          | +          | -          | +          | +           | 872,068                 | 49.55    | SRR3066775                   |
| NSUI174 | Canada | 10                | 10                  | Novel                      | 77          | 142          | 49         | 15         | 221         | 64          | 38          | +          | -          | -          | +           | 854,114                 | 48.53    | SRR3066776                   |
| NSUI175 | Canada | 9                 | 9                   | 16                         | 5           | 17           | 5          | 12         | 1           | 10          | 4           | +          | -          | +          | +           | 935,604                 | 53.16    | SRR3066777                   |
| NSUI176 | Canada | 9                 | 9                   | 16                         | 5           | 17           | 5          | 12         | 1           | 10          | 4           | +          | -          | +          | +           | 943,246                 | 53.59    | SRR3066778                   |
| NSUI177 | Canada | 9                 | 9                   | 16                         | 5           | 17           | 5          | 12         | 1           | 10          | 4           | +          | -          | +          | +           | 843,796                 | 47.94    | SRR3066779                   |
| NSUI178 | Canada | 9                 | 9                   | 16                         | 5           | 17           | 5          | 12         | 1           | 10          | 4           | +          | -          | +          | +           | 1,033,140               | 58.70    | SRR3066781                   |

| Strain  | Origin | Serotype          |          | Sequence Type <sup>b</sup> | <i>aroA</i> | <i>cpn60</i> | <i>dpr</i> | <i>gki</i> | <i>mutS</i> | <i>recA</i> | <i>thrA</i> | <i>mrp</i> | <i>epf</i> | <i>sly</i> | <i>recN</i> | Illumina Sequence Data  |          | SRA Accession N <sup>o</sup> |
|---------|--------|-------------------|----------|----------------------------|-------------|--------------|------------|------------|-------------|-------------|-------------|------------|------------|------------|-------------|-------------------------|----------|------------------------------|
|         |        | Coag <sup>a</sup> | Pipeline |                            |             |              |            |            |             |             |             |            |            |            |             | N <sup>o</sup> of Reads | Coverage |                              |
|         |        |                   |          |                            |             |              |            |            |             |             |             |            |            |            |             |                         |          |                              |
| NSUI179 | Canada | 25                | 25       | Novel                      | 23          | 68           | 21         | 39         | 14          | 6           | 8           | -          | -          | -          | +           | 1,137,366               | 64.62    | SRR3066782                   |
| NSUI180 | Canada | 10                | 10       | Novel                      | 23          | 68           | 21         | 4          | 14          | 6           | 8           | -          | -          | -          | +           | 888,536                 | 50.49    | SRR3066783                   |
| NSUI181 | Canada | 12                | 12       | Novel                      | 147         | 124          | 130        | 176        | 216         | 106         | Novel       | -          | -          | -          | +           | 1,043,610               | 59.30    | SRR3066784                   |
| NSUI182 | Canada | 13                | 13       | Novel                      | 96          | 177          | 129        | 235        | 139         | 90          | 12          | -          | -          | -          | +           | 1,057,448               | 60.08    | SRR3066785                   |
| NSUI183 | Canada | 14                | 14       | 1                          | 1           | 1            | 1          | 1          | 1           | 1           | 1           | +          | +          | +          | +           | 1,018,224               | 57.85    | SRR3066786                   |
| NSUI184 | Canada | 14                | 14       | 1                          | 1           | 1            | 1          | 1          | 1           | 1           | 1           | +          | +          | +          | +           | 908,638                 | 51.63    | SRR3066787                   |
| NSUI185 | Canada | 14                | 14       | 28                         | 2           | 30           | 5          | 34         | 31          | 3           | 25          | +          | -          | -          | +           | 947,042                 | 53.81    | SRR3066788                   |
| NSUI186 | Canada | 14                | 14       | 1                          | 1           | 1            | 1          | 1          | 1           | 1           | 1           | +          | +          | +          | +           | 1,039,894               | 59.08    | SRR3066789                   |
| NSUI187 | Canada | 14                | 14       | 1                          | 1           | 1            | 1          | 1          | 1           | 1           | 1           | +          | +          | +          | +           | 973,144                 | 55.29    | SRR3066790                   |
| NSUI188 | Canada | 14                | 14       | 1                          | 1           | 1            | 1          | 1          | 1           | 1           | 1           | +          | +          | +          | +           | 890,230                 | 50.58    | SRR3066792                   |
| NSUI189 | Canada | 14                | 14       | 1                          | 1           | 1            | 1          | 1          | 1           | 1           | 1           | +          | +          | +          | +           | 1,114,954               | 63.35    | SRR3066793                   |
| NSUI191 | Canada | 16                | 16       | Novel                      | 23          | 25           | 21         | 4          | 7           | 30          | 8           | -          | -          | -          | +           | 1,044,802               | 59.36    | SRR3066794                   |
| NSUI192 | Canada | 16                | 16       | Novel                      | 23          | 68           | 21         | 4          | 14          | 6           | 8           | -          | -          | -          | +           | 965,198                 | 54.84    | SRR3066795                   |
| NSUI193 | Canada | 16                | 16       | Novel                      | 17          | 68           | 21         | 39         | 14          | 6           | 8           | -          | -          | -          | +           | 981,358                 | 55.76    | SRR3066796                   |
| NSUI194 | Canada | 16                | 16       | Novel                      | 63          | 15           | 45         | 4          | 16          | 68          | 12          | -          | -          | -          | +           | 1,229,950               | 69.88    | SRR3066797                   |
| NSUI195 | Canada | 16                | 16       | Novel                      | 15          | 8            | 24         | 12         | 1           | 10          | 4           | +          | -          | +          | +           | 948,660                 | 53.90    | SRR3066798                   |
| NSUI196 | Canada | 16                | 16       | Novel                      | 23          | 190          | 21         | 4          | 14          | 6           | 8           | -          | -          | -          | +           | 1,087,292               | 61.78    | SRR3066799                   |
| NSUI197 | Canada | 16                | 16       | 73                         | 33          | 37           | 2          | 19         | 13          | 5           | 12          | -          | -          | -          | +           | 1,146,336               | 65.13    | SRR3066800                   |
| NSUI198 | Canada | 17                | 17       | 76                         | 8           | 23           | 36         | 24         | 21          | 22          | 12          | +          | -          | +          | +           | 1,181,714               | 67.14    | SRR3066801                   |
| NSUI199 | Canada | 17                | 17       | 76                         | 8           | 23           | 36         | 24         | 21          | 22          | 12          | +          | -          | +          | +           | 1,140,434               | 64.80    | SRR3066803                   |
| NSUI200 | Canada | 18                | 18       | Novel                      | 8           | 21           | 36         | 24         | 42          | 22          | 12          | -          | -          | +          | +           | 1,005,268               | 57.12    | SRR3066804                   |
| NSUI201 | Canada | 18                | 18       | 76                         | 8           | 23           | 36         | 24         | 21          | 22          | 12          | +          | -          | +          | +           | 842,416                 | 47.86    | SRR3066805                   |
| NSUI202 | Canada | 19                | 19       | 76                         | 8           | 23           | 36         | 24         | 21          | 22          | 12          | +          | -          | +          | +           | 1,180,026               | 67.05    | SRR3066806                   |
| NSUI203 | Canada | 19                | 19       | 76                         | 8           | 23           | 36         | 24         | 21          | 22          | 12          | +          | -          | +          | +           | 1,025,704               | 58.28    | SRR3066807                   |
| NSUI204 | Canada | 19                | 19       | Novel                      | 8           | 21           | 36         | 24         | 42          | 22          | 12          | -          | -          | +          | +           | 906,570                 | 51.51    | SRR3066808                   |
| NSUI208 | Canada | 21                | 21       | Novel                      | 25          | 228          | 58         | 24         | LC          | 37          | 16          | -          | -          | -          | +           | 348,308                 | 19.79    | SRR3066809                   |
| (145)   |        |                   |          |                            |             |              |            |            |             |             |             |            |            |            |             |                         |          |                              |
| NSUI218 | Canada | 23                | 23       | 108                        | 8           | 21           | 5          | 45         | 44          | 22          | 23          | +          | -          | +          | +           | 836,914                 | 47.55    | SRR3066810                   |
| NSUI221 | Canada | 23                | 23       | 483                        | 8           | 21           | 3          | 45         | 44          | 22          | 23          | +          | -          | +          | +           | 1,028,634               | 58.45    | SRR3066811                   |
| NSUI222 | Canada | 23                | 23       | 108                        | 8           | 21           | 5          | 45         | 44          | 22          | 23          | +          | -          | +          | +           | 1,181,352               | 67.12    | SRR3066812                   |
| NSUI223 | Canada | 23                | 23       | 108                        | 8           | 21           | 5          | 45         | 44          | 22          | 23          | +          | -          | +          | +           | 1,049,984               | 59.66    | SRR3066814                   |
| NSUI224 | Canada | 24                | 24       | 68                         | 14          | 20           | 31         | 27         | 27          | 34          | 18          | -          | -          | -          | +           | 1,127,460               | 64.06    | SRR3066815                   |
| NSUI225 | Canada | 24                | 24       | 221                        | 77          | 33           | 49         | 15         | 33          | 26          | 6           | -          | -          | -          | +           | 1,042,090               | 59.21    | SRR3066816                   |



| Strain  | Origin | Serotype          |          | Sequence Type <sup>b</sup> | <i>aroA</i> | <i>cpn60</i> | <i>dpr</i> | <i>gki</i> | <i>mutS</i> | <i>recA</i> | <i>thrA</i> | <i>mrp</i> | <i>epf</i> | <i>sly</i> | <i>recN</i> | Illumina Sequence Data  |          | SRA Accession N <sup>o</sup> |
|---------|--------|-------------------|----------|----------------------------|-------------|--------------|------------|------------|-------------|-------------|-------------|------------|------------|------------|-------------|-------------------------|----------|------------------------------|
|         |        | Coag <sup>a</sup> | Pipeline |                            |             |              |            |            |             |             |             |            |            |            |             | N <sup>o</sup> of Reads | Coverage |                              |
| NSUI267 | Canada | 1/2               | ND       | 28                         | ND          | ND           | ND         | ND         | ND          | ND          | ND          | ND         | ND         | ND         | ND          | ND                      | ND       | ND                           |
| NSUI268 | Canada | 1/2               | ND       | 28                         | ND          | ND           | ND         | ND         | ND          | ND          | ND          | ND         | ND         | ND         | ND          | ND                      | ND       | ND                           |
| NSUI269 | Canada | 1/2               | ND       | 28                         | ND          | ND           | ND         | ND         | ND          | ND          | ND          | ND         | ND         | ND         | ND          | ND                      | ND       | ND                           |
| NSUI270 | Canada | 1/2               | ND       | 28                         | ND          | ND           | ND         | ND         | ND          | ND          | ND          | ND         | ND         | ND         | ND          | ND                      | ND       | ND                           |
| NSUI271 | Canada | 1/2               | ND       | 28                         | ND          | ND           | ND         | ND         | ND          | ND          | ND          | ND         | ND         | ND         | ND          | ND                      | ND       | ND                           |
| NSUI272 | Canada | 1/2               | ND       | 28                         | ND          | ND           | ND         | ND         | ND          | ND          | ND          | ND         | ND         | ND         | ND          | ND                      | ND       | ND                           |
| NSUI273 | Canada | 1/2               | ND       | 28                         | ND          | ND           | ND         | ND         | ND          | ND          | ND          | ND         | ND         | ND         | ND          | ND                      | ND       | ND                           |
| NSUI275 | Canada | 1/2               | ND       | 28                         | ND          | ND           | ND         | ND         | ND          | ND          | ND          | ND         | ND         | ND         | ND          | ND                      | ND       | ND                           |
| NSUI276 | Canada | 1/2               | ND       | 28                         | ND          | ND           | ND         | ND         | ND          | ND          | ND          | ND         | ND         | ND         | ND          | ND                      | ND       | ND                           |
| NSUI277 | Canada | 1/2               | ND       | 28                         | ND          | ND           | ND         | ND         | ND          | ND          | ND          | ND         | ND         | ND         | ND          | ND                      | ND       | ND                           |

<sup>a</sup> Coag: Coagglutination

<sup>b</sup> Sequence type based on SRST2 MLST results

<sup>c</sup> Novel: Allele or allele combinations not found in MLST database

<sup>d</sup> NT: Non-typeable. This strain was re-sequenced and serotype was assigned by the pipeline as result shown in brackets.

<sup>e</sup> LC: Low Coverage; the coverage was too low to call an allele by the program SRST2, but manual inspection of the BAM files revealed a result shown in brackets.

<sup>f</sup> SRA accession of the re-sequenced strain is SRR3458042.

<sup>g</sup> DK: Denmark.

<sup>h</sup> NL: The Netherlands.

<sup>i</sup> ND: Not done.

**Table S2. Serotypes and accession numbers for reference capsule type sequences used in this study.**

| <b>Serotypes</b> | <b>GenBank<br/>accession<br/>no.</b> |
|------------------|--------------------------------------|
| <b>1</b>         | JF273644                             |
| <b>2</b>         | AF118389                             |
| <b>3</b>         | JF273646                             |
| <b>4</b>         | JF273647                             |
| <b>5</b>         | JF273648                             |
| <b>6</b>         | AB737818                             |
| <b>7</b>         | JF273649                             |
| <b>8</b>         | JF273650                             |
| <b>9</b>         | JF273651                             |
| <b>10</b>        | JF273652                             |
| <b>11</b>        | AB737819                             |
| <b>12</b>        | AB737820                             |
| <b>13</b>        | AB737821                             |
| <b>15</b>        | AB737823                             |
| <b>16</b>        | HQ694980                             |
| <b>17</b>        | AB737824                             |
| <b>18</b>        | AB737825                             |
| <b>19</b>        | JF273654                             |
| <b>21</b>        | AB737827                             |
| <b>23</b>        | JF273655                             |
| <b>24</b>        | AB737829                             |
| <b>25</b>        | JF273656                             |
| <b>27</b>        | AB737831                             |
| <b>28</b>        | AB737832                             |
| <b>29</b>        | AB737833                             |
| <b>30</b>        | AB737834                             |
| <b>31</b>        | AB737835                             |

**Table S3. Information and pipeline results of *S. suis* strains downloaded from the Sequence Read Archive**

| Strain | Serotype  |                | Source | Host | Accession Number |
|--------|-----------|----------------|--------|------|------------------|
|        | Published | Pipeline       |        |      |                  |
| S11H   | 1         | 1              | UK     | Pig  | ERS132481        |
| S13C   | 1         | 1              | UK     | Pig  | ERS132494        |
| S13H   | 1         | 1              | UK     | Pig  | ERS132497        |
| LL-Q   | 1         | 1              | UK     | Pig  | ERS132353        |
| LL-R   | 1         | 1              | UK     | Pig  | ERS132354        |
| S13I   | 1         | 1              | UK     | Pig  | ERS132498        |
| S93M   | 1         | 1              | UK     | Pig  | ERS132524        |
| S97P   | 1         | 1              | UK     | Pig  | ERS132527        |
| S11J   | 1         | - <sup>a</sup> | UK     | Pig  | ERS132539        |
| S11K   | 1         | 3              | UK     | Pig  | ERS132540        |
| S14M   | 1         | 1/2            | UK     | Pig  | ERS132548        |
| LS8X   | 1         | 12             | UK     | Pig  | ERS132440        |
| LS5Q   | 1         | 11             | UK     | Pig  | ERS132457        |
| LS6R   | 1         | 11             | UK     | Pig  | ERS132458        |
| LS0C   | 1         | 15             | UK     | Pig  | ERS132462        |
| LS9U   | 1         | 30             | UK     | Pig  | ERS132461        |
| LSW    | 1         | 15             | UK     | Pig  | ERS132364        |
| S15Y   | 1         | 1              | UK     | Pig  | ERS132511        |
| LL-P   | 2         | 2              | UK     | Pig  | ERS132352        |
| S10Y   | 2         | 2              | UK     | Pig  | ERS132474        |
| S10E   | 2         | 2              | UK     | Pig  | ERS132538        |
| S11I   | 2         | 2              | UK     | Pig  | ERS132482        |
| S12T   | 2         | 2              | UK     | Pig  | ERS132487        |
| S12V   | 2         | 2              | UK     | Pig  | ERS132489        |
| S15T   | 2         | 2              | UK     | Pig  | ERS132506        |
| S15V   | 2         | 2              | UK     | Pig  | ERS132508        |
| S16B   | 2         | 2              | UK     | Pig  | ERS132512        |
| S16D   | 2         | 2              | UK     | Pig  | ERS132514        |
| S16E   | 2         | 2              | UK     | Pig  | ERS132515        |
| S17G   | 2         | 2              | UK     | Pig  | ERS132517        |
| S17H   | 2         | 2              | UK     | Pig  | ERS132518        |
| S90C   | 2         | 2              | UK     | Pig  | ERS132464        |
| S92D   | 2         | 2              | UK     | Pig  | ERS132465        |
| S93E   | 2         | 2              | UK     | Pig  | ERS132466        |
| S96H   | 2         | 2              | UK     | Pig  | ERS132468        |
| S91R   | 2         | 2              | UK     | Pig  | ERS132529        |
| S94U   | 2         | 2              | UK     | Pig  | ERS132532        |



| Strain | Serotype  |          | Source  | Host  | Accession Number |
|--------|-----------|----------|---------|-------|------------------|
|        | Published | Pipeline |         |       |                  |
| S10X   | 2         | 2        | UK      | Pig   | ERS132473        |
| S10A   | 2         | 2        | UK      | Pig   | ERS132475        |
| S11G   | 2         | 2        | UK      | Pig   | ERS132480        |
| S12S   | 2         | 2        | UK      | Pig   | ERS132486        |
| S13B   | 2         | 2        | UK      | Pig   | ERS132493        |
| S13F   | 2         | 2        | UK      | Pig   | ERS132496        |
| S15U   | 2         | 2        | UK      | Pig   | ERS132507        |
| S94F   | 2         | 2        | UK      | Pig   | ERS132467        |
| S11N   | 2         | 2        | UK      | Pig   | ERS132485        |
| S12U   | 2         | 2        | UK      | Pig   | ERS132488        |
| S13D   | 2         | 2        | UK      | Pig   | ERS132495        |
| S16C   | 2         | 2        | UK      | Pig   | ERS132513        |
| S99B   | 2         | 2        | UK      | Pig   | ERS132463        |
| S99Q   | 2         | 2        | UK      | Pig   | ERS132528        |
| S92S   | 2         | 2        | UK      | Pig   | ERS132530        |
| S98Y   | 2         | 2        | UK      | Pig   | ERS132471        |
| LSL    | 2         | 2        | UK      | Pig   | ERS132363        |
| LS0E   | 2         | 31       | UK      | Pig   | ERS132422        |
| LS1F   | 2         | 1/2      | UK      | Pig   | ERS132423        |
| LS2G   | 2         | 2        | UK      | Pig   | ERS132424        |
| LS3H   | 2         | 2        | UK      | Pig   | ERS132425        |
| LS1Q   | 2         | 1/2      | UK      | Pig   | ERS132433        |
| LS2R   | 2         | 1/2      | UK      | Pig   | ERS132434        |
| LS8U   | 2         | 2        | UK      | Pig   | ERS132390        |
| LSS    | 2         | 2        | UK      | Pig   | ERS132366        |
| LSD    | 2         | 2        | UK      | Pig   | ERS132367        |
| LS1N   | 2         | 2        | UK      | Pig   | ERS132383        |
| LS2O   | 2         | 2        | UK      | Pig   | ERS132384        |
| LS5C   | 2         | 2        | UK      | Pig   | ERS132397        |
| LS0T   | 2         | 2        | UK      | Pig   | ERS132412        |
| LS1U   | 2         | 2        | UK      | Pig   | ERS132413        |
| LS7S   | 2         | 2        | UK      | Pig   | ERS132459        |
| LS8T   | 2         | 2        | UK      | Pig   | ERS132460        |
| S10C   | 2         | 2        | UK      | Pig   | ERS132477        |
| B18E   | 2         | 2        | Vietnam | Human | ERS156197        |
| B10F   | 2         | 2        | Vietnam | Human | ERS156198        |
| B11G   | 2         | 2        | Vietnam | Human | ERS156199        |
| B17H   | 2         | 2        | Vietnam | Human | ERS156200        |
| B18I   | 2         | 2        | Vietnam | Human | ERS156201        |
| B23J   | 2         | 2        | Vietnam | Human | ERS156202        |

| Strain | Serotype  |          | Source  | Host  | Accession Number |
|--------|-----------|----------|---------|-------|------------------|
|        | Published | Pipeline |         |       |                  |
| B29K   | 2         | 2        | Vietnam | Human | ERS156203        |
| B21L   | 2         | 2        | Vietnam | Human | ERS156204        |
| B23M   | 2         | 2        | Vietnam | Human | ERS156205        |
| B26N   | 2         | 2        | Vietnam | Human | ERS156206        |
| B24O   | 2         | 2        | Vietnam | Human | ERS156207        |
| B28P   | 2         | 2        | Vietnam | Human | ERS156208        |
| B21Q   | 2         | 2        | Vietnam | Human | ERS156209        |
| B27R   | 2         | 2        | Vietnam | Human | ERS156210        |
| B21S   | 2         | 2        | Vietnam | Human | ERS156211        |
| B21T   | 2         | 2        | Vietnam | Human | ERS156212        |
| B23U   | 2         | 2        | Vietnam | Human | ERS156213        |
| B27V   | 2         | 2        | Vietnam | Human | ERS156214        |
| B24W   | 2         | 2        | Vietnam | Human | ERS156215        |
| B22X   | 2         | 2        | Vietnam | Human | ERS156216        |
| B28Y   | 2         | 2        | Vietnam | Human | ERS156217        |
| B33Z   | 2         | 2        | Vietnam | Human | ERS156218        |
| B38A   | 2         | 2        | Vietnam | Human | ERS018463        |
| B35B   | 2         | 2        | Vietnam | Human | ERS156220        |
| B31C   | 2         | 2        | Vietnam | Human | ERS156221        |
| B39D   | 2         | 2        | Vietnam | Human | ERS156222        |
| B34E   | 2         | 2        | Vietnam | Human | ERS156223        |
| B35F   | 2         | 2        | Vietnam | Human | ERS156224        |
| B36G   | 2         | 2        | Vietnam | Human | ERS156225        |
| B37H   | 2         | 2        | Vietnam | Human | ERS156226        |
| B38I   | 2         | 2        | Vietnam | Human | ERS156227        |
| B32J   | 2         | 2        | Vietnam | Human | ERS156228        |
| B36K   | 2         | 2        | Vietnam | Human | ERS156229        |
| B33L   | 2         | 2        | Vietnam | Human | ERS156230        |
| B41M   | 2         | 2        | Vietnam | Human | ERS156231        |
| B48N   | 2         | 2        | Vietnam | Human | ERS156232        |
| B44O   | 2         | 2        | Vietnam | Human | ERS156233        |
| B46P   | 2         | 2        | Vietnam | Human | ERS156234        |
| B41Q   | 2         | 2        | Vietnam | Human | ERS156235        |
| B44R   | 2         | 2        | Vietnam | Human | ERS156236        |
| B42S   | 2         | 2        | Vietnam | Human | ERS156237        |
| B40T   | 2         | 2        | Vietnam | Human | ERS156238        |
| B41U   | 2         | 2        | Vietnam | Human | ERS156239        |
| B45V   | 2         | 2        | Vietnam | Human | ERS156240        |
| B46W   | 2         | 2        | Vietnam | Human | ERS156241        |
| B41X   | 2         | 2        | Vietnam | Human | ERS156242        |
| B48Y   | 2         | 2        | Vietnam | Human | ERS156243        |

| Strain | Serotype  |          | Source  | Host  | Accession Number |
|--------|-----------|----------|---------|-------|------------------|
|        | Published | Pipeline |         |       |                  |
| E03B   | 2         | 2        | Vietnam | Human | ERS156244        |
| E00C   | 2         | 2        | Vietnam | Human | ERS156245        |
| E05E   | 2         | 2        | Vietnam | Human | ERS156246        |
| E00F   | 2         | 2        | Vietnam | Human | ERS156247        |
| E03G   | 2         | 2        | Vietnam | Human | ERS156248        |
| E04H   | 2         | 2        | Vietnam | Human | ERS156249        |
| E01I   | 2         | 2        | Vietnam | Human | ERS156250        |
| E04J   | 2         | 2        | Vietnam | Human | ERS156251        |
| E00K   | 2         | 2        | Vietnam | Human | ERS156252        |
| E08L   | 2         | 2        | Vietnam | Human | ERS156253        |
| E01D   | 2         | 2        | Vietnam | Human | ERS156254        |
| E14M   | 2         | 2        | Vietnam | Human | ERS156255        |
| E10N   | 2         | 2        | Vietnam | Human | ERS156256        |
| E11O   | 2         | 2        | Vietnam | Human | ERS156257        |
| E17P   | 2         | 2        | Vietnam | Human | ERS156258        |
| E11Q   | 2         | 14       | Vietnam | Human | ERS156259        |
| E21R   | 2         | 2        | Vietnam | Human | ERS156260        |
| E23S   | 2         | 2        | Vietnam | Human | ERS156261        |
| E24T   | 2         | 2        | Vietnam | Human | ERS156262        |
| E21U   | 2         | 2        | Vietnam | Human | ERS156263        |
| E21V   | 2         | 2        | Vietnam | Human | ERS156264        |
| E34W   | 2         | 14       | Vietnam | Human | ERS156265        |
| E36X   | 2         | 2        | Vietnam | Human | ERS156266        |
| E30Y   | 2         | 2        | Vietnam | Human | ERS156267        |
| E30Z   | 2         | 2        | Vietnam | Human | ERS156268        |
| E39A   | 2         | 2        | Vietnam | Human | ERS156269        |
| E56B   | 2         | 2        | Vietnam | Human | ERS156270        |
| E57C   | 2         | 2        | Vietnam | Human | ERS156271        |
| E58D   | 2         | 2        | Vietnam | Human | ERS156272        |
| E55E   | 2         | 2        | Vietnam | Human | ERS156273        |
| E63F   | 2         | 2        | Vietnam | Human | ERS156274        |
| E66G   | 2         | 2        | Vietnam | Human | ERS156275        |
| E62H   | 2         | 2        | Vietnam | Human | ERS156276        |
| E60I   | 2         | 2        | Vietnam | Human | ERS156277        |
| S1J    | 2         | 2        | Vietnam | Human | ERS156311        |
| S1K    | 2         | 2        | Vietnam | Human | ERS156312        |
| S1L    | 2         | 2        | Vietnam | Human | ERS156313        |
| S1M    | 2         | 2        | Vietnam | Human | ERS156314        |
| S1N    | 2         | 2        | Vietnam | Human | ERS156315        |
| S1O    | 2         | 2        | Vietnam | Human | ERS156316        |
| S2P    | 2         | 2        | Vietnam | Human | ERS156317        |

| Strain | Serotype  |          | Source  | Host  | Accession Number |
|--------|-----------|----------|---------|-------|------------------|
|        | Published | Pipeline |         |       |                  |
| S2Q    | 2         | 2        | Vietnam | Human | ERS156318        |
| S2R    | 2         | 2        | Vietnam | Human | ERS156319        |
| S2S    | 2         | 2        | Vietnam | Human | ERS156320        |
| S2T    | 2         | 2        | Vietnam | Human | ERS156321        |
| S2U    | 2         | 2        | Vietnam | Human | ERS156322        |
| S2V    | 2         | 2        | Vietnam | Human | ERS156323        |
| S2W    | 2         | 2        | Vietnam | Human | ERS156324        |
| S2X    | 2         | 2        | Vietnam | Human | ERS156325        |
| S2Y    | 2         | 2        | Vietnam | Human | ERS156326        |
| S3Z    | 2         | 2        | Vietnam | Human | ERS156327        |
| S3A    | 2         | 2        | Vietnam | Human | ERS156328        |
| S3B    | 2         | 2        | Vietnam | Human | ERS156329        |
| S3C    | 2         | 2        | Vietnam | Human | ERS156330        |
| S3D    | 2         | 2        | Vietnam | Human | ERS156331        |
| S3E    | 2         | 2        | Vietnam | Human | ERS156332        |
| S3F    | 2         | 2        | Vietnam | Human | ERS156333        |
| S3G    | 2         | 2        | Vietnam | Human | ERS156334        |
| S4H    | 2         | 2        | Vietnam | Human | ERS156335        |
| S4I    | 2         | 2        | Vietnam | Human | ERS156336        |
| S4J    | 2         | 2        | Vietnam | Human | ERS156337        |
| S4K    | 2         | 2        | Vietnam | Human | ERS156338        |
| S6L    | 2         | 2        | Vietnam | Human | ERS156339        |
| S6M    | 2         | 2        | Vietnam | Human | ERS156340        |
| S6N    | 2         | -        | Vietnam | Human | ERS156341        |
| S6O    | 2         | 2        | Vietnam | Human | ERS156342        |
| S7P    | 2         | 2        | Vietnam | Human | ERS156343        |
| S7Q    | 2         | 2        | Vietnam | Human | ERS156344        |
| S7R    | 2         | 2        | Vietnam | Human | ERS156345        |
| S7S    | 2         | 2        | Vietnam | Human | ERS156346        |
| S7T    | 2         | 2        | Vietnam | Human | ERS156347        |
| S8U    | 2         | 2        | Vietnam | Human | ERS156348        |
| S8V    | 2         | 2        | Vietnam | Human | ERS156349        |
| S8W    | 2         | 2        | Vietnam | Human | ERS156350        |
| S8X    | 2         | 2        | Vietnam | Human | ERS156351        |
| S8Y    | 2         | 2        | Vietnam | Human | ERS156352        |
| S8Z    | 2         | 2        | Vietnam | Human | ERS156353        |
| S9J    | 2         | 2        | Vietnam | Human | ERS156354        |
| S9A    | 2         | 2        | Vietnam | Human | ERS156355        |
| S11P   | 2         | 2        | Vietnam | Human | ERS156356        |
| S12Z   | 2         | 2        | Vietnam | Human | ERS156357        |
| V20B   | 2         | 2        | Vietnam | Human | ERS156358        |

| Strain | Serotype  |          | Source  | Host  | Accession Number |
|--------|-----------|----------|---------|-------|------------------|
|        | Published | Pipeline |         |       |                  |
| V22C   | 2         | 2        | Vietnam | Human | ERS156359        |
| V27D   | 2         | 2        | Vietnam | Human | ERS156360        |
| V32E   | 2         | 2        | Vietnam | Human | ERS156361        |
| V39F   | 2         | 2        | Vietnam | Human | ERS156362        |
| V30G   | 2         | 2        | Vietnam | Human | ERS156363        |
| V36H   | 2         | 2        | Vietnam | Human | ERS156364        |
| V31I   | 2         | 2        | Vietnam | Human | ERS156365        |
| V31J   | 2         | 2        | Vietnam | Human | ERS156366        |
| V33K   | 2         | 2        | Vietnam | Human | ERS156367        |
| V34L   | 2         | 2        | Vietnam | Human | ERS156368        |
| V36M   | 2         | 2        | Vietnam | Human | ERS156369        |
| V37N   | 2         | 2        | Vietnam | Human | ERS156370        |
| V38O   | 2         | 2        | Vietnam | Human | ERS156371        |
| V34P   | 2         | 2        | Vietnam | Human | ERS156372        |
| V39Q   | 2         | 2        | Vietnam | Human | ERS156373        |
| V30R   | 2         | 2        | Vietnam | Human | ERS156374        |
| V35S   | 2         | 2        | Vietnam | Human | ERS156375        |
| V30T   | 2         | 2        | Vietnam | Human | ERS156376        |
| V36U   | 2         | 2        | Vietnam | Human | ERS156377        |
| V36V   | 2         | 2        | Vietnam | Human | ERS156378        |
| V37W   | 2         | 2        | Vietnam | Human | ERS156379        |
| V38X   | 2         | 2        | Vietnam | Human | ERS156380        |
| V38Y   | 2         | 2        | Vietnam | Human | ERS156381        |
| V38Z   | 2         | 2        | Vietnam | Human | ERS156382        |
| OZ-A   | 2         | 2        | Vietnam | Pig   | ERS156386        |
| OZ-B   | 2         | 2        | Vietnam | Pig   | ERS156383        |
| OZ-C   | 2         | 2        | Vietnam | Pig   | ERS156384        |
| OZ-D   | 2         | 2        | Vietnam | Pig   | ERS156385        |
| CU2A   | 2         | 2        | Vietnam | Pig   | ERS156388        |
| CU2Z   | 2         | 2        | Vietnam | Pig   | ERS156387        |
| F1L    | 2         | 2        | Vietnam | Pig   | ERS156279        |
| F1N    | 2         | 2        | Vietnam | Pig   | ERS156280        |
| F2P    | 2         | 2        | Vietnam | Pig   | ERS156281        |
| F2S    | 2         | 2        | Vietnam | Pig   | ERS156282        |
| F4V    | 2         | 2        | Vietnam | Pig   | ERS156283        |
| F5D    | 2         | 2        | Vietnam | Pig   | ERS156284        |
| F5F    | 2         | 2        | Vietnam | Pig   | ERS156285        |
| F5K    | 2         | 2        | Vietnam | Pig   | ERS156286        |
| F7L    | 2         | 2        | Vietnam | Pig   | ERS156287        |
| F7M    | 2         | 2        | Vietnam | Pig   | ERS156288        |

| Strain | Serotype  |          | Source  | Host | Accession Number |
|--------|-----------|----------|---------|------|------------------|
|        | Published | Pipeline |         |      |                  |
| F7N    | 2         | 2        | Vietnam | Pig  | ERS156289        |
| F9O    | 2         | 2        | Vietnam | Pig  | ERS156290        |
| F19J   | 2         | 2        | Vietnam | Pig  | ERS156278        |
| F17K   | 2         | 2        | Vietnam | Pig  | ERS156292        |
| F14M   | 2         | 2        | Vietnam | Pig  | ERS156293        |
| F21O   | 2         | 2        | Vietnam | Pig  | ERS156294        |
| F20Q   | 2         | 2        | Vietnam | Pig  | ERS156295        |
| F25R   | 2         | 2        | Vietnam | Pig  | ERS156296        |
| F38T   | 2         | 2        | Vietnam | Pig  | ERS156297        |
| F36U   | 2         | 2        | Vietnam | Pig  | ERS156298        |
| F45W   | 2         | 2        | Vietnam | Pig  | ERS156299        |
| F49X   | 2         | 2        | Vietnam | Pig  | ERS156300        |
| F48Y   | 2         | 2        | Vietnam | Pig  | ERS156301        |
| F41Z   | 2         | 2        | Vietnam | Pig  | ERS156302        |
| F48A   | 2         | 2        | Vietnam | Pig  | ERS156303        |
| F43B   | 2         | 2        | Vietnam | Pig  | ERS156304        |
| F51C   | 2         | 2        | Vietnam | Pig  | ERS156305        |
| F57E   | 2         | 2        | Vietnam | Pig  | ERS156306        |
| F57G   | 2         | 2        | Vietnam | Pig  | ERS156307        |
| F55H   | 2         | 2        | Vietnam | Pig  | ERS156308        |
| F50I   | 2         | 2        | Vietnam | Pig  | ERS156309        |
| F53J   | 2         | 2        | Vietnam | Pig  | ERS156310        |
| LL-T   | 3         | 3        | UK      | Pig  | ERS132356        |
| LL-S   | 3         | 3        | UK      | Pig  | ERS132355        |
| S10B   | 3         | 3        | UK      | Pig  | ERS132476        |
| S11L   | 3         | 3        | UK      | Pig  | ERS132483        |
| S11M   | 3         | 8        | UK      | Pig  | ERS132484        |
| S12Q   | 3         | 3        | UK      | Pig  | ERS132542        |
| S15S   | 3         | 3        | UK      | Pig  | ERS132549        |
| S15X   | 3         | 3        | UK      | Pig  | ERS132510        |
| S99Z   | 3         | 3        | UK      | Pig  | ERS132536        |
| LS7T   | 3         | 10       | UK      | Pig  | ERS132389        |
| LS3S   | 3         | 3        | UK      | Pig  | ERS132435        |
| LS4T   | 3         | 3        | UK      | Pig  | ERS132436        |
| S13A   | 3         | 3        | UK      | Pig  | ERS132492        |
| S12X   | 4         | 4        | UK      | Pig  | ERS132544        |
| LL-U   | 4         | 4        | UK      | Pig  | ERS132357        |
| S14J   | 4         | 4        | UK      | Pig  | ERS132547        |
| S14K   | 4         | 4        | UK      | Pig  | ERS132499        |
| S14L   | 4         | 4        | UK      | Pig  | ERS132500        |
| S14O   | 4         | 4        | UK      | Pig  | ERS132502        |

| Strain | Serotype  |          | Source | Host | Accession Number |
|--------|-----------|----------|--------|------|------------------|
|        | Published | Pipeline |        |      |                  |
| LS0M   | 4         | 4        | UK     | Pig  | ERS132382        |
| LS7A   | 4         | -        | UK     | Pig  | ERS132419        |
| LS4P   | 4         | 4        | UK     | Pig  | ERS132456        |
| S97A   | 4         | 4        | UK     | Pig  | ERS132520        |
| LS3A   | 4         | 4        | UK     | Pig  | ERS132395        |
| LS1M   | 6         | 6        | UK     | Pig  | ERS132453        |
| LL-X   | 7         | 7        | UK     | Pig  | ERS132360        |
| S10D   | 7         | 7        | UK     | Pig  | ERS132478        |
| S15R   | 7         | 7        | UK     | Pig  | ERS132505        |
| LL-W   | 7         | 7        | UK     | Pig  | ERS132359        |
| S10W   | 7         | 7        | UK     | Pig  | ERS132472        |
| S11O   | 7         | 7        | UK     | Pig  | ERS132541        |
| S12R   | 7         | 7        | UK     | Pig  | ERS132543        |
| LS3D   | 7         | 7        | UK     | Pig  | ERS132445        |
| LS4E   | 7         | 7        | UK     | Pig  | ERS132446        |
| LS5F   | 7         | 7        | UK     | Pig  | ERS132447        |
| LS6Z   | 7         | 7        | UK     | Pig  | ERS132418        |
| S13E   | 8         | 8        | UK     | Pig  | ERS132545        |
| S13G   | 8         | 8        | UK     | Pig  | ERS132546        |
| S16Z   | 8         | 8        | UK     | Pig  | ERS132550        |
| S91K   | 9         | 9        | UK     | Pig  | ERS132522        |
| S15W   | 9         | 8        | UK     | Pig  | ERS132509        |
| S96W   | 9         | 1/2      | UK     | Pig  | ERS132534        |
| S97X   | 9         | 8        | UK     | Pig  | ERS132535        |
| S96O   | 12        | 12       | UK     | Pig  | ERS132526        |
| LL-Z   | 14        | 14       | UK     | Pig  | ERS132362        |
| LL-Y   | 14        | 14       | UK     | Pig  | ERS132361        |
| S12Y   | 14        | 14       | UK     | Pig  | ERS132491        |
| S99I   | 14        | 14       | UK     | Pig  | ERS132469        |
| S92L   | 14        | 14       | UK     | Pig  | ERS132523        |
| S95V   | 14        | 14       | UK     | Pig  | ERS132533        |
| LS2D   | 14        | 25       | UK     | Pig  | ERS132374        |
| LS3E   | 14        | 16       | UK     | Pig  | ERS132375        |
| LS4F   | 14        | 14       | UK     | Pig  | ERS132376        |
| S12W   | 14        | 14       | UK     | Pig  | ERS132490        |
| S16F   | 16        | 16       | UK     | Pig  | ERS132516        |
| S95G   | 23        | -        | UK     | Pig  | ERS132521        |
| S17I   | 1/2       | 1/2      | UK     | Pig  | ERS132519        |
| S10F   | 1/2       | 1/2      | UK     | Pig  | ERS132479        |
| S16A   | 1/2       | 15       | UK     | Pig  | ERS132551        |
| LS7W   | 1/2       | 1/2      | UK     | Pig  | ERS132439        |

| Strain | Serotype     |          | Source | Host | Accession Number |
|--------|--------------|----------|--------|------|------------------|
|        | Published    | Pipeline |        |      |                  |
| LS5R   | 1/2          | 1/2      | UK     | Pig  | ERS132387        |
| LSH    | 1/2          | 1/2      | UK     | Pig  | ERS132365        |
| LS6G   | 1/2          | 1/2      | UK     | Pig  | ERS132448        |
| LS4Q   | 1/2          | 1/2      | UK     | Pig  | ERS132386        |
| LS6S   | 1/2          | 1/2      | UK     | Pig  | ERS132388        |
| LS9V   | 1/2          | 1/2      | UK     | Pig  | ERS132391        |
| LS7H   | 1/2          | 1/2      | UK     | Pig  | ERS132449        |
| LS1C   | Non-typeable | 31       | UK     | Pig  | ERS132373        |
| LS8J   | Non-typeable | 16       | UK     | Pig  | ERS132380        |
| LS3P   | Non-typeable | 24       | UK     | Pig  | ERS132385        |
| LS0X   | Non-typeable | 31       | UK     | Pig  | ERS132392        |
| LS1Y   | Non-typeable | 24       | UK     | Pig  | ERS132393        |
| LS2Z   | Non-typeable | 24       | UK     | Pig  | ERS132394        |
| LS4B   | Non-typeable | 8        | UK     | Pig  | ERS132396        |
| LS7E   | Non-typeable | 24       | UK     | Pig  | ERS132399        |
| LS8F   | Non-typeable | -        | UK     | Pig  | ERS132400        |
| LS9G   | Non-typeable | 31       | UK     | Pig  | ERS132401        |
| LS0I   | Non-typeable | 6        | UK     | Pig  | ERS132402        |
| LS1J   | Non-typeable | 21       | UK     | Pig  | ERS132403        |
| LS2K   | Non-typeable | 16       | UK     | Pig  | ERS132404        |
| LS4M   | Non-typeable | 15       | UK     | Pig  | ERS132406        |
| LS7P   | Non-typeable | 16       | UK     | Pig  | ERS132409        |
| LS8Q   | Non-typeable | 31       | UK     | Pig  | ERS132410        |
| LS9R   | Non-typeable | -        | UK     | Pig  | ERS132411        |
| LS3W   | Non-typeable | 21       | UK     | Pig  | ERS132415        |
| LS4X   | Non-typeable | -        | UK     | Pig  | ERS132416        |
| LS5Y   | Non-typeable | 9        | UK     | Pig  | ERS132417        |
| LS8B   | Non-typeable | 31       | UK     | Pig  | ERS132420        |
| LS9C   | Non-typeable | 10       | UK     | Pig  | ERS132421        |
| LS4I   | Non-typeable | 21       | UK     | Pig  | ERS132426        |
| LS5J   | Non-typeable | 10       | UK     | Pig  | ERS132427        |
| LS7L   | Non-typeable | 8        | UK     | Pig  | ERS132429        |
| LS8M   | Non-typeable | 8        | UK     | Pig  | ERS132430        |
| LS9N   | Non-typeable | 31       | UK     | Pig  | ERS132431        |
| LS0P   | Non-typeable | 9        | UK     | Pig  | ERS132432        |
| LS5U   | Non-typeable | 31       | UK     | Pig  | ERS132437        |
| LS6V   | Non-typeable | 8        | UK     | Pig  | ERS132438        |
| LS9Y   | Non-typeable | 15       | UK     | Pig  | ERS132441        |
| LS0A   | Non-typeable | 31       | UK     | Pig  | ERS132442        |
| LS1B   | Non-typeable | 15       | UK     | Pig  | ERS132443        |
| LS2C   | Non-typeable | 16       | UK     | Pig  | ERS132444        |



| Strain | Serotype     |          | Source | Host | Accession Number |
|--------|--------------|----------|--------|------|------------------|
|        | Published    | Pipeline |        |      |                  |
| LS8I   | Non-typeable | -        | UK     | Pig  | ERS132450        |
| LS9J   | Non-typeable | 8        | UK     | Pig  | ERS132451        |
| LSV    | Non-typeable | 10       | UK     | Pig  | ERS132371        |
| LS0L   | Non-typeable | 31       | UK     | Pig  | ERS132452        |
| LS2N   | Non-typeable | 9        | UK     | Pig  | ERS132454        |
| S93T   | Non-typeable | -        | UK     | Pig  | ERS132531        |
| LS0B   | Non-typeable | -        | UK     | Pig  | ERS132372        |
| LSK    | Non-typeable | 16       | UK     | Pig  | ERS132370        |
| S95N   | Non-typeable | -        | UK     | Pig  | ERS132525        |
| LS6D   | Non-typeable | -        | UK     | Pig  | ERS132398        |
| LS2V   | Non-typeable | 19       | UK     | Pig  | ERS132414        |
| LS6K   | Non-typeable | 9        | UK     | Pig  | ERS132428        |

<sup>a</sup> -: No serotype was called for this strain, indicating that it is a non-typeable

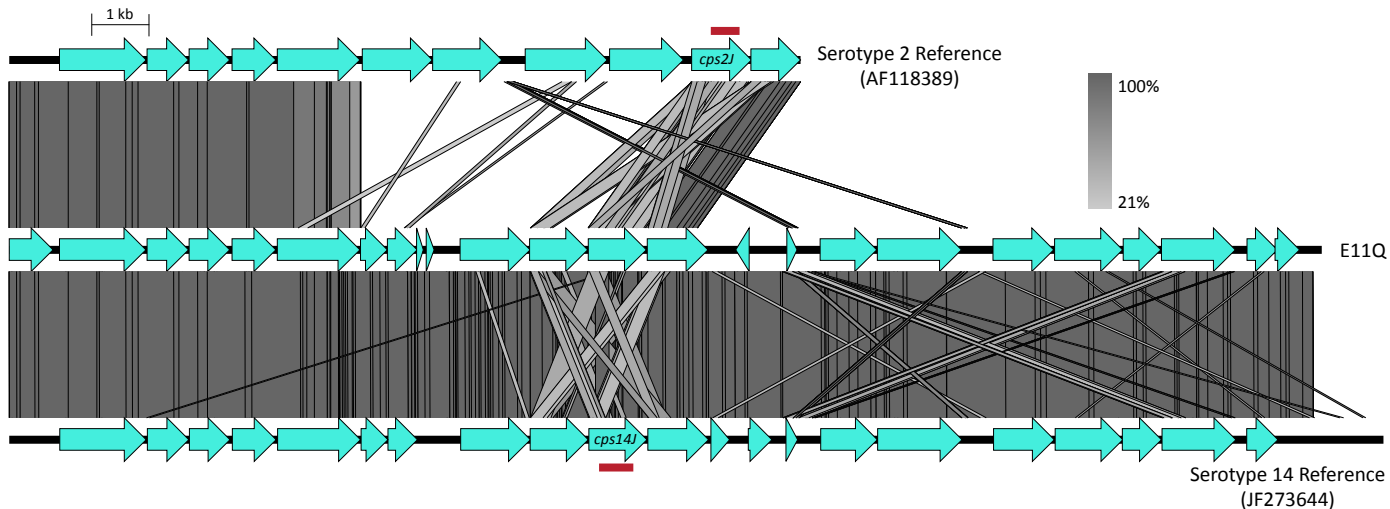

**Figure S1.** Comparison of *cps* loci show that strain E11Q is actually serotype 14, as identified by our pipeline. Strain W11Q had been typed as serotype 2 by serological methods. Short-read WGS data for strain E11Q were downloaded from the Sequence Read Archive and *de novo* assembled using the A5 pipeline. The *cps* loci of a serotype 2 reference strain (top), strain E11Q (middle) and a serotype 14 reference strain (bottom) were compared using the program easyFig. Serotype specific regions searched for by our pipeline are indicated in red. GenBank Accession numbers for reference sequences are provided.

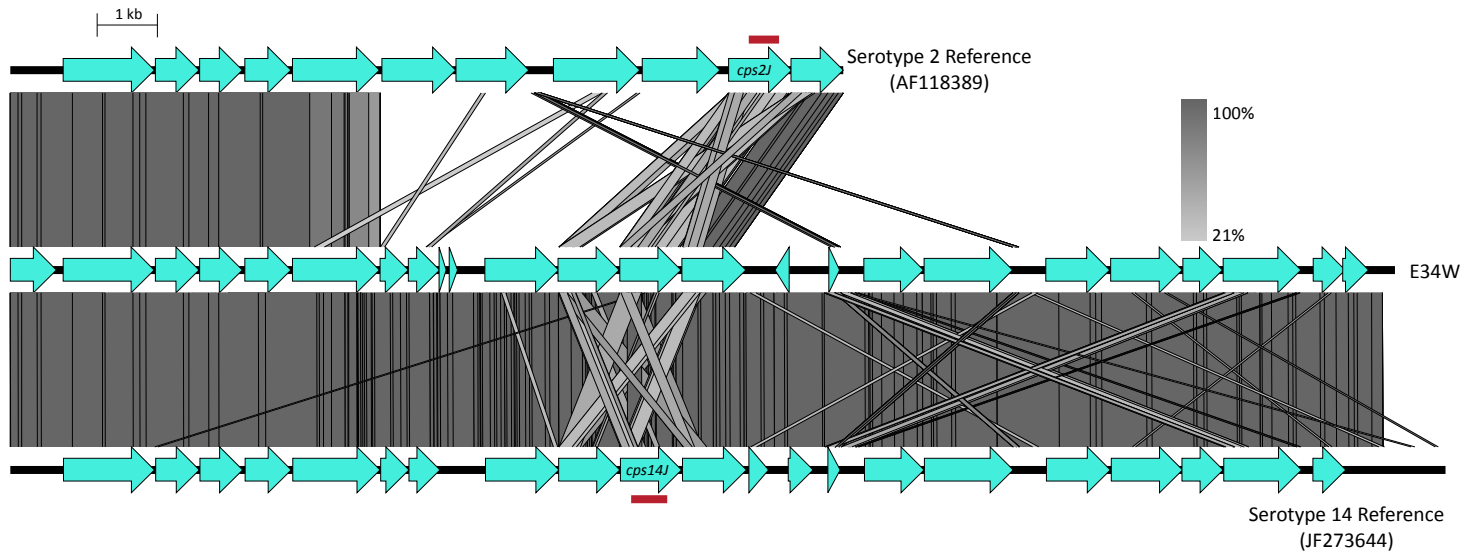

**Figure S2. Comparison of *cps* loci show that strain E34W is actually serotype 14, as identified by our pipeline.** Strain W11Q had been typed as serotype 2 by serological methods. Short-read WGS data for strain E34W were downloaded from the Sequence Read Archive and *de novo* assembled using the A5 pipeline. The *cps* loci of a serotype 2 reference strain (top), strain E34W (middle) and a serotype 14 reference strain (bottom) were compared using the program easyFig. Serotype specific regions searched for by our pipeline are indicated in red. GenBank Accession numbers for reference sequences are provided.

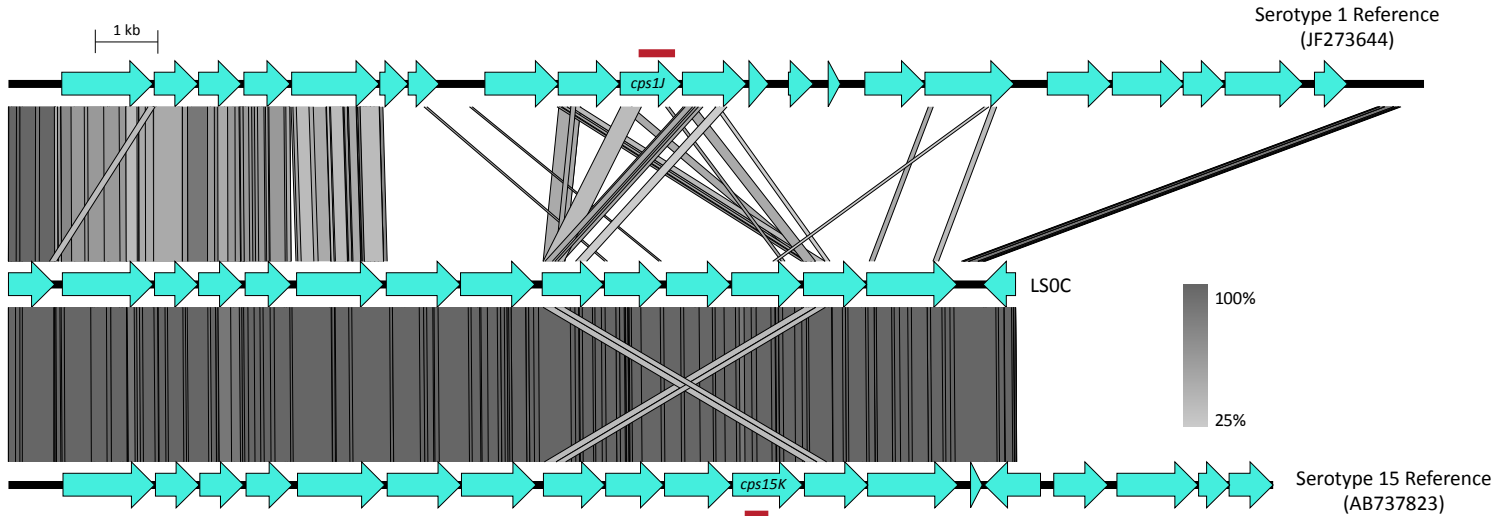

**Figure S3. Comparison of *cps* loci show that strain LS0C is actually serotype 15, as identified by our pipeline.** Strain LS0C had been typed as serotype 1 by serological methods. Short-read WGS data for strain LS0C were downloaded from the Sequence Read Archive and *de novo* assembled using the A5 pipeline. The *cps* loci of a serotype 1 reference strain (top), strain LS0C (middle) and a serotype 15 reference strain (bottom) were compared using the program easyFig. Serotype specific regions searched for by our pipeline are indicated in red. GenBank Accession numbers for reference sequences are provided.

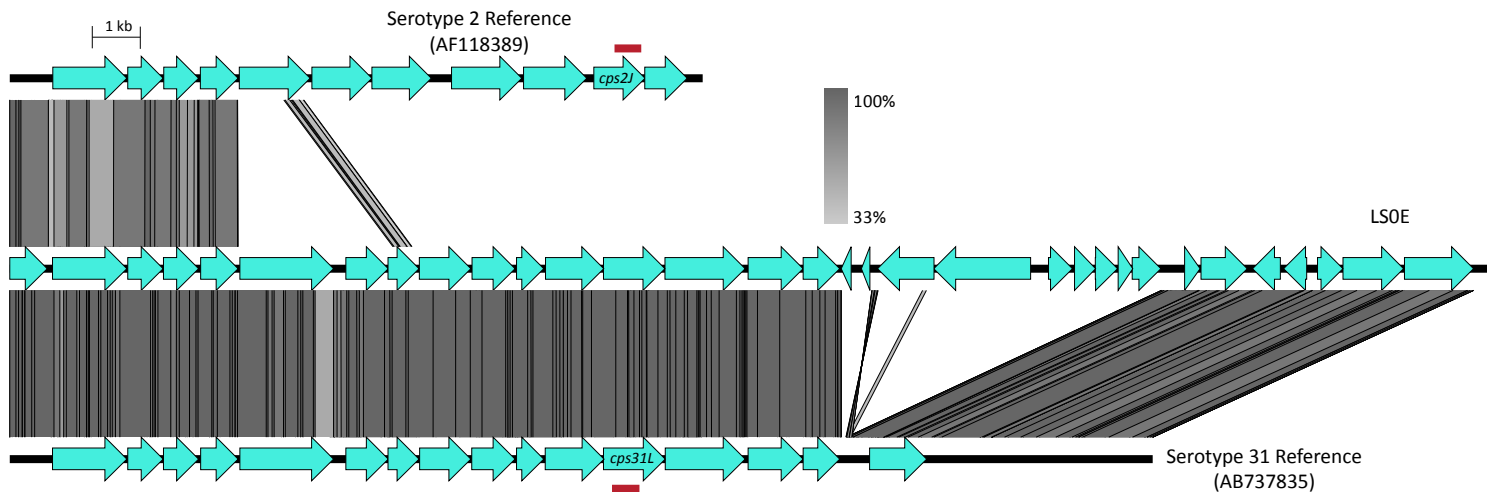

**Figure S4. Comparison of *cps* loci show that strain LS0E is actually serotype 31, as identified by our pipeline.** Strain LS0E had been typed as serotype 2 by serological methods. Short-read WGS data for strain LS0E were downloaded from the Sequence Read Archive and *de novo* assembled using the A5 pipeline. The *cps* loci of a serotype 2 reference strain (top), strain LS0E (middle) and a serotype 31 reference strain (bottom) were compared using the program easyFig. Serotype specific regions searched for by our pipeline are indicated in red. GenBank Accession numbers for reference sequences are provided.

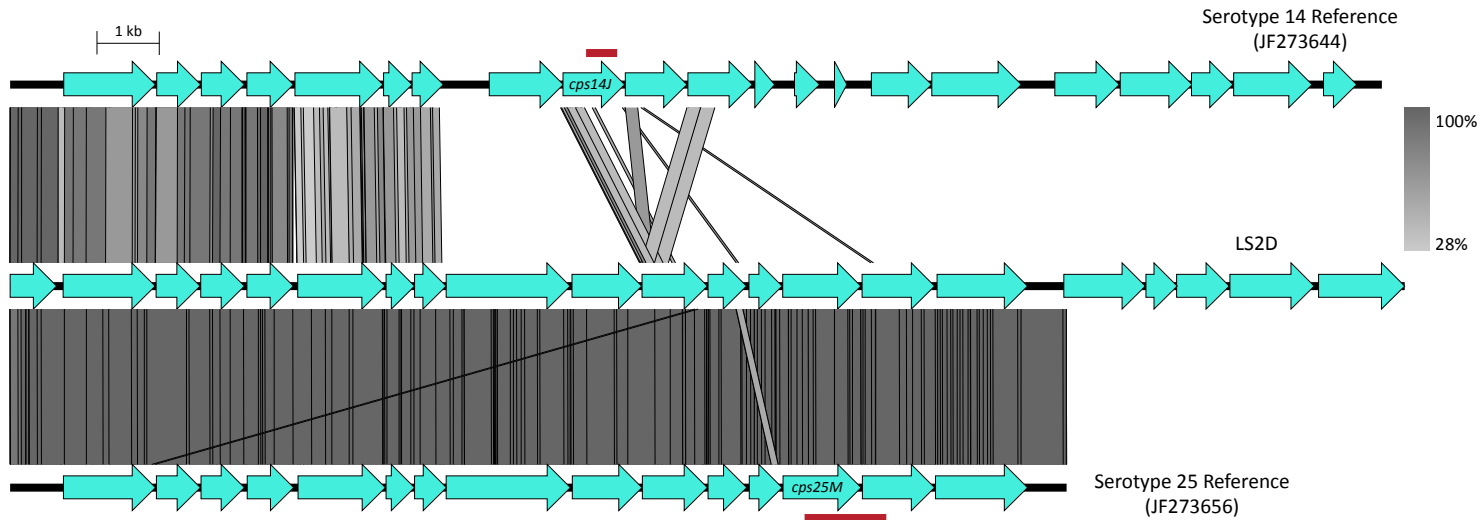

**Figure S5. Comparison of *cps* loci show that strain LS2D is actually serotype 25, as identified by our pipeline.** Strain LS2D had been typed as serotype 14 by serological methods. Short-read WGS data for strain LS2D were downloaded from the Sequence Read Archive and *de novo* assembled using the A5 pipeline. The *cps* loci of a serotype 14 reference strain (top), strain LS2D (middle) and a serotype 25 reference strain (bottom) were compared using the program easyFig. Serotype specific regions searched for by our pipeline are indicated in red. GenBank Accession numbers for reference sequences are provided.

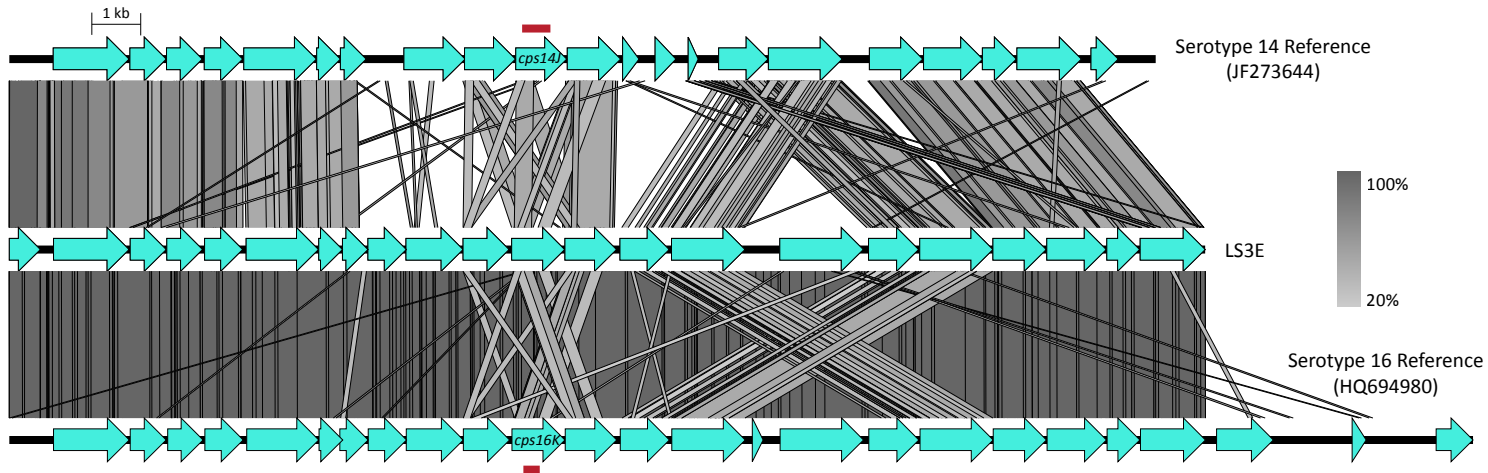

**Figure S6. Comparison of *cps* loci show that strain LSE3 is actually serotype 16, as identified by our pipeline.** Strain LS3E had been typed as serotype 14 by serological methods. Short-read WGS data for strain LS3E were downloaded from the Sequence Read Archive and *de novo* assembled using the A5 pipeline. The *cps* loci of a serotype 14 reference strain (top), strain LS3E (middle) and a serotype 16 reference strain (bottom) were compared using the program easyFig. Serotype specific regions searched for by our pipeline are indicated in red. GenBank Accession numbers for reference sequences are provided.

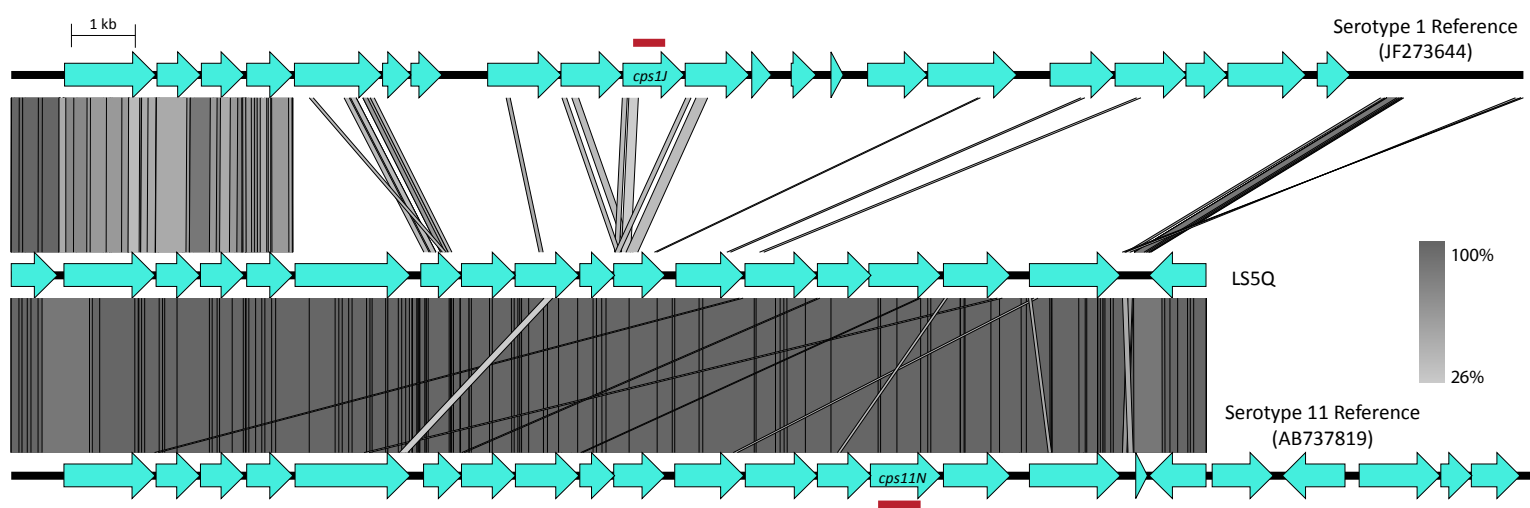

**Figure S7. Comparison of *cps* loci show that strain LS5Q is actually serotype 11, as identified by our pipeline.** Strain LS5Q had been typed as serotype 1 by serological methods. Short-read WGS data for strain LS5Q were downloaded from the Sequence Read Archive and *de novo* assembled using the A5 pipeline. The *cps* loci of a serotype 1 reference strain (top), strain LS5Q (middle) and a serotype 11 reference strain (bottom) were compared using the program easyFig. Serotype specific regions searched for by our pipeline are indicated in red. GenBank Accession numbers for reference sequences are provided.



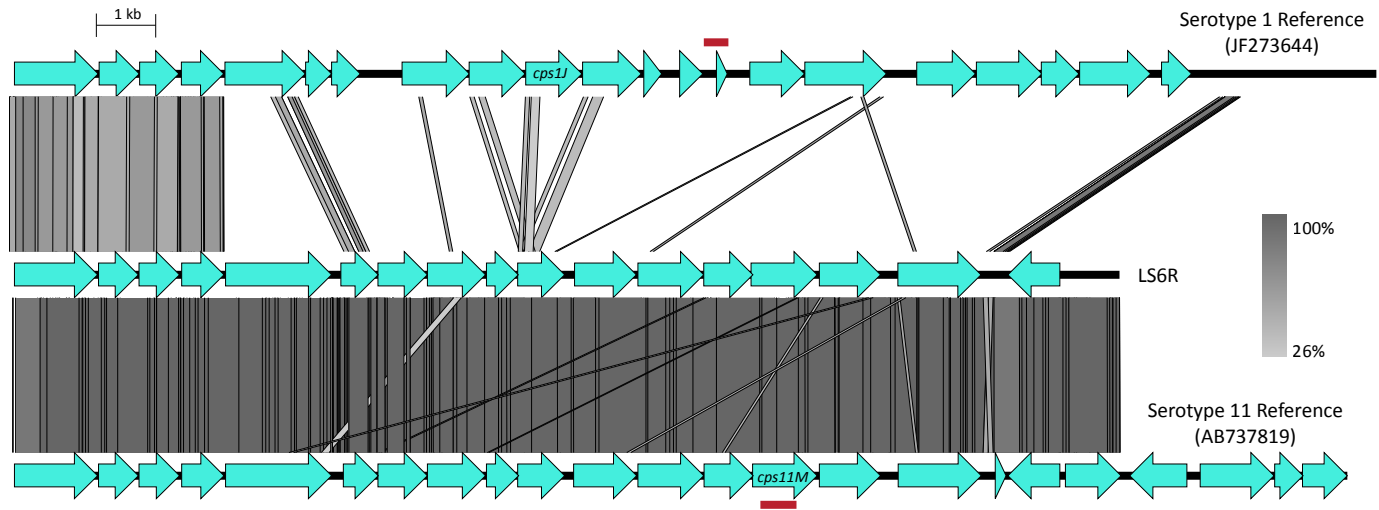

**Figure S8. Comparison of *cps* loci show that strain LS6R is actually serotype 11, as identified by our pipeline.** Strain LS6R had been typed as serotype 1 by serological methods. Short-read WGS data for strain LS6R were downloaded from the Sequence Read Archive and *de novo* assembled using the A5 pipeline. The *cps* loci of a serotype 1 reference strain (top), strain LS6R (middle) and a serotype 11 reference strain (bottom) were compared using the program easyFig. Serotype specific regions searched for by our pipeline are indicated in red. GenBank Accession numbers for reference sequences are provided.

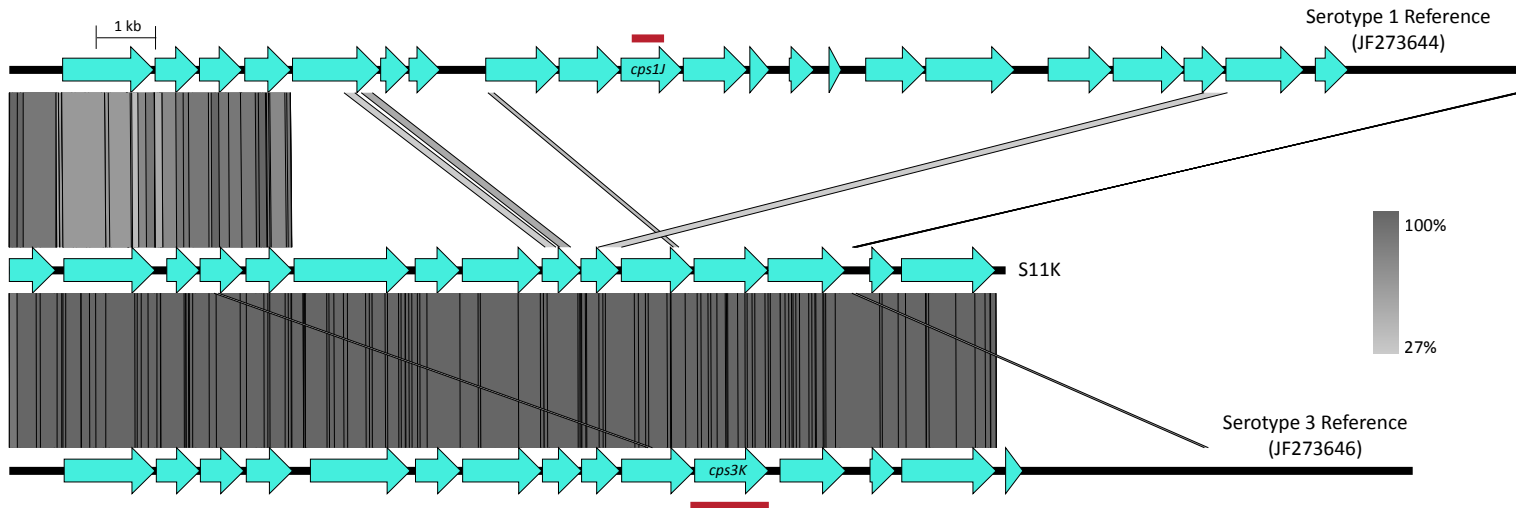

**Figure S9. Comparison of *cps* loci show that strain S11K is actually serotype 3, as identified by our pipeline.** Strain S11K had been typed as serotype 1 by serological methods. Short-read WGS data for strain LSW were downloaded from the Sequence Read Archive and *de novo* assembled using the A5 pipeline. The *cps* loci of a serotype 1 reference strain (top), strain S11K (middle) and a serotype 3 reference strain (bottom) were compared using the program easyFig. Serotype specific regions searched for by our pipeline are indicated in red. GenBank Accession numbers for reference sequences are provided.

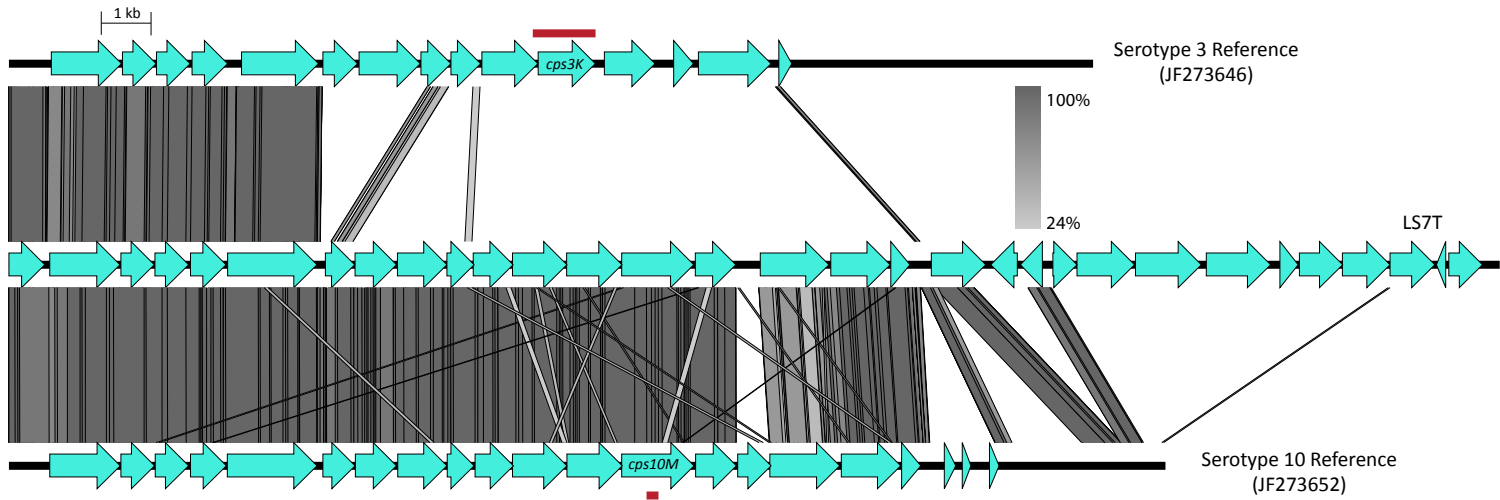

**Figure S10. Comparison of *cps* loci show that strain LS7T is actually serotype 10, as identified by our pipeline.** Strain LS7T had been typed as serotype 3 by serological methods. Short-read WGS data for strain LS7T were downloaded from the Sequence Read Archive and *de novo* assembled using the A5 pipeline. The *cps* loci of a serotype 3 reference strain (top), strain LS7T (middle) and a serotype 10 reference strain (bottom) were compared using the program easyFig. Serotype specific regions searched for by our pipeline are indicated in red. GenBank Accession numbers for reference sequences are provided.

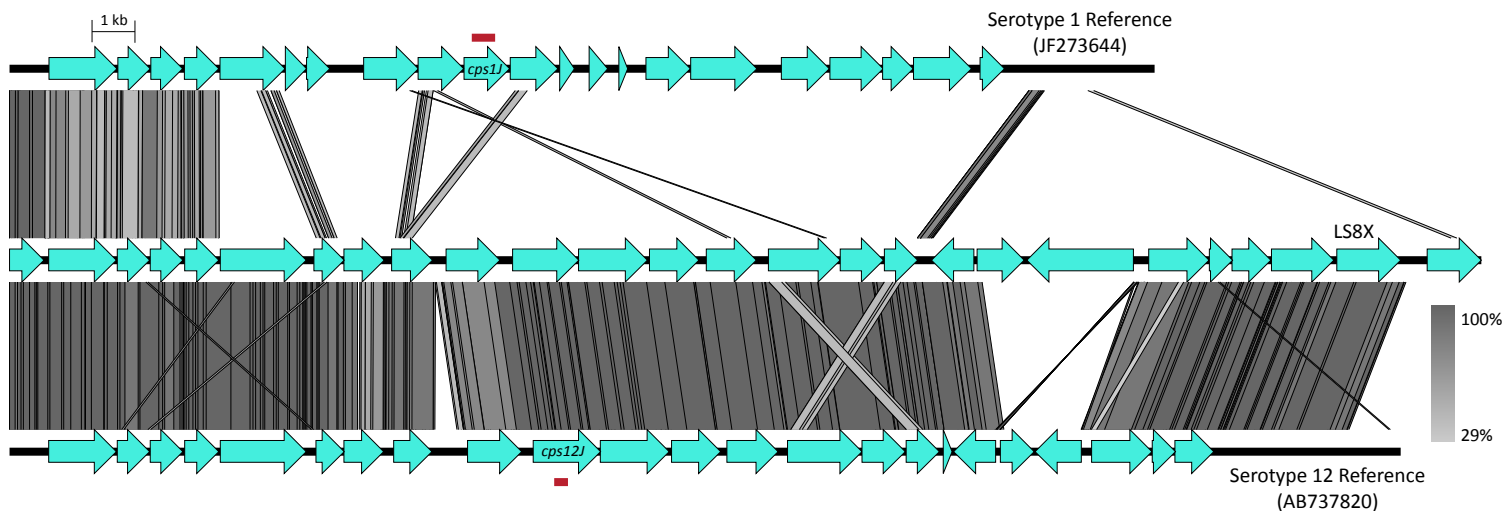

**Figure S11. Comparison of *cps* loci show that strain LS8X is actually serotype 12, as identified by our pipeline.** Strain LS8X had been typed as serotype 1 by serological methods. Short-read WGS data for strain LS8X were downloaded from the Sequence Read Archive and *de novo* assembled using the A5 pipeline. The *cps* loci of a serotype 1 reference strain (top), strain LS8X (middle) and a serotype 12 reference strain (bottom) were compared using the program easyFig. Serotype specific regions searched for by our pipeline are indicated in red. GenBank Accession numbers for reference sequences are provided.

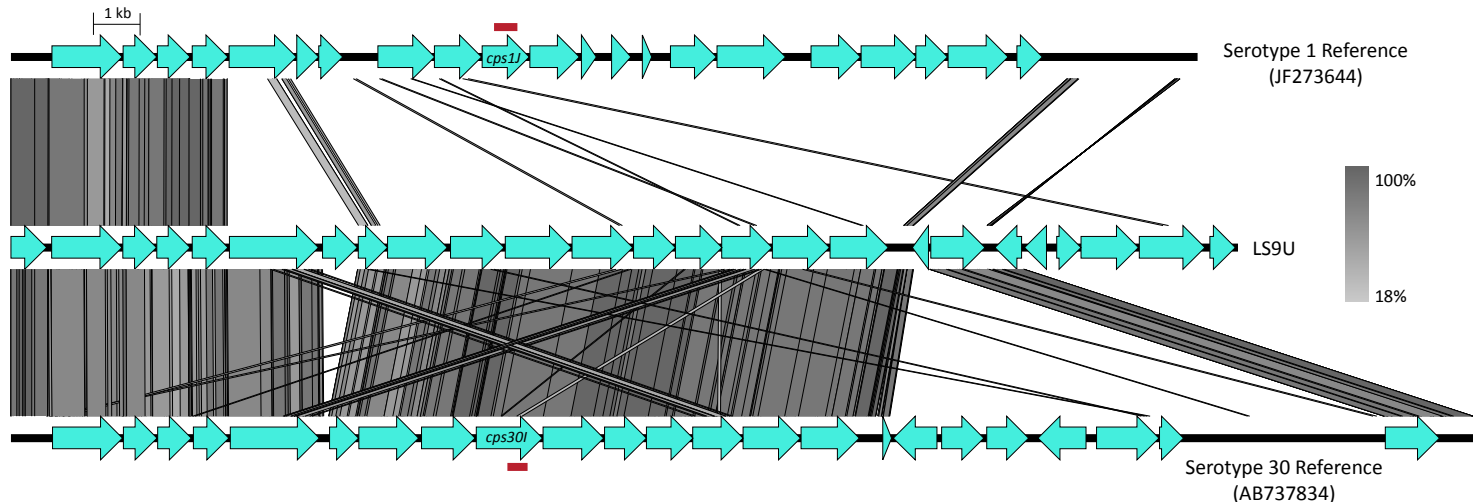

**Figure S12. Comparison of *cps* loci show that strain LS9U is actually serotype 30, as identified by our pipeline.** Strain LS9U had been typed as serotype 1 by serological methods. Short-read WGS data for strain LS9U were downloaded from the Sequence Read Archive and *de novo* assembled using the A5 pipeline. The *cps* loci of a serotype 1 reference strain (top), strain LS9U (middle) and a serotype 30 reference strain (bottom) were compared using the program easyFig. Serotype specific regions searched for by our pipeline are indicated in red. GenBank Accession numbers for reference sequences are provided.

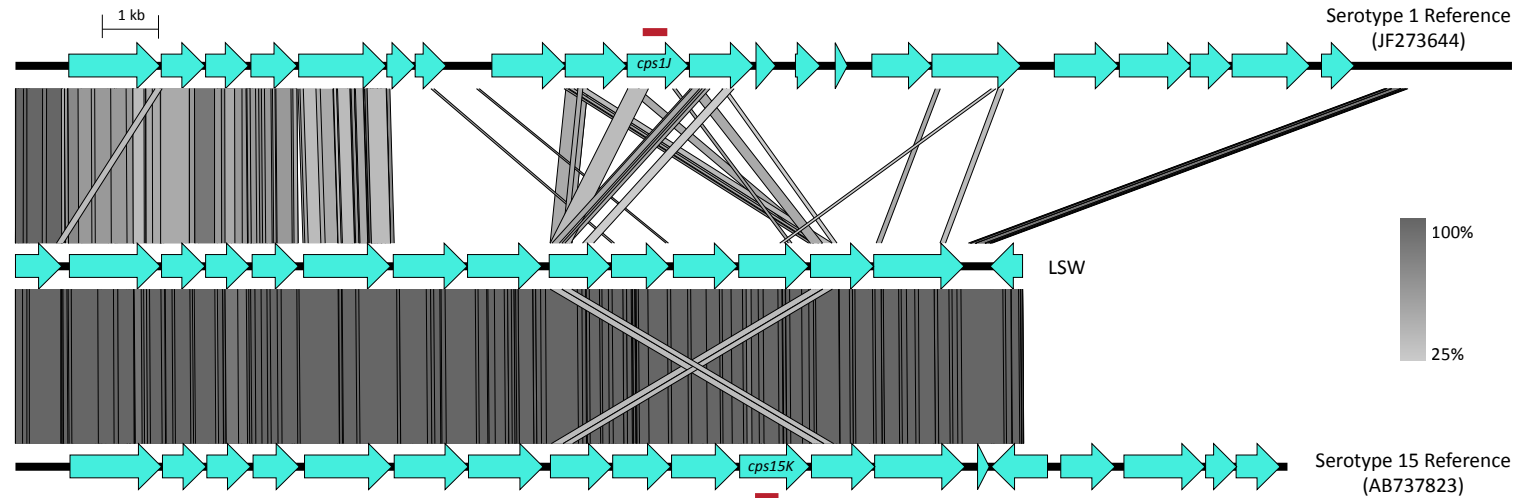

**Figure S13. Comparison of *cps* loci show that strain LSW is actually serotype 15, as identified by our pipeline.** Strain LSW had been typed as serotype 1 by serological methods. Short-read WGS data for strain LSW were downloaded from the Sequence Read Archive and *de novo* assembled using the A5 pipeline. The *cps* loci of a serotype 1 reference strain (top), strain LSW (middle) and a serotype 15 reference strain (bottom) were compared using the program easyFig. Serotype specific regions searched for by our pipeline are indicated in red. GenBank Accession numbers for reference sequences are provided.

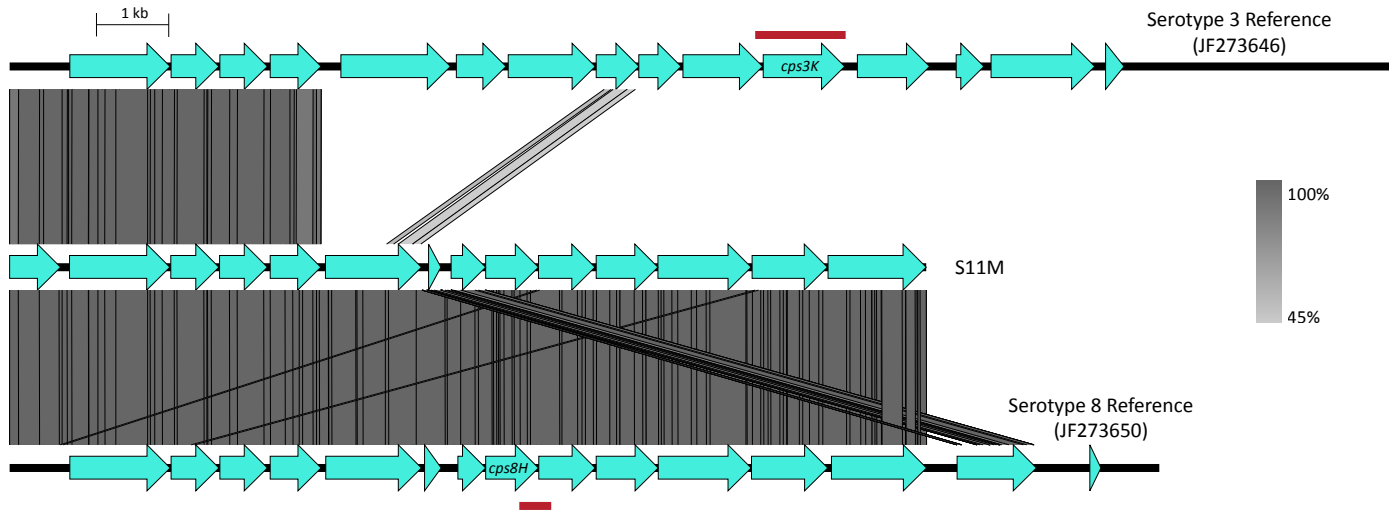

**Figure S14. Comparison of *cps* loci show that strain S11M is actually serotype 8, as identified by our pipeline.** Strain S11M had been typed as serotype 3 by serological methods. Short-read WGS data for strain LSW were downloaded from the Sequence Read Archive and *de novo* assembled using the A5 pipeline. The *cps* loci of a serotype 3 reference strain (top), strain S11M (middle) and a serotype 8 reference strain (bottom) were compared using the program easyFig. Serotype specific regions searched for by our pipeline are indicated in red. GenBank Accession numbers for reference sequences are provided.

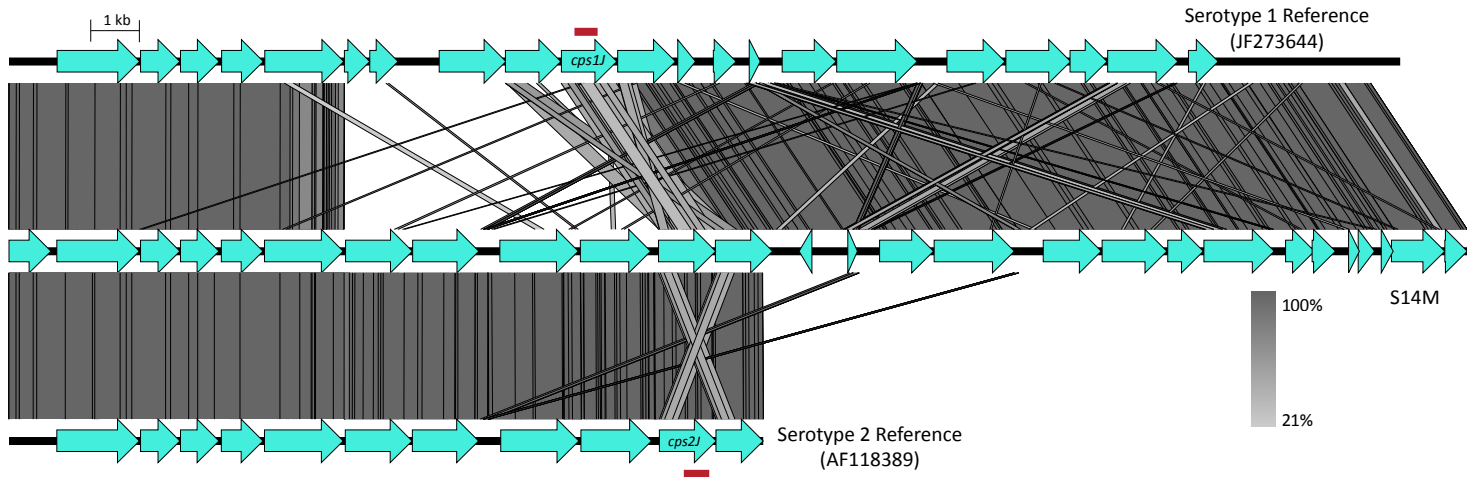

**Figure S15. Comparison of *cps* loci show that strain S14M is actually serotype 15, as identified by our pipeline.** Strain S14M had been typed as serotype 1 by serological methods. Short-read WGS data for strain LSW were downloaded from the Sequence Read Archive and *de novo* assembled using the A5 pipeline. The *cps* loci of a serotype 1 reference strain (top), strain S14M (middle) and a serotype 2 reference strain (bottom) were compared using the program easyFig. Serotype specific regions searched for by our pipeline are indicated in red. GenBank Accession numbers for reference sequences are provided.



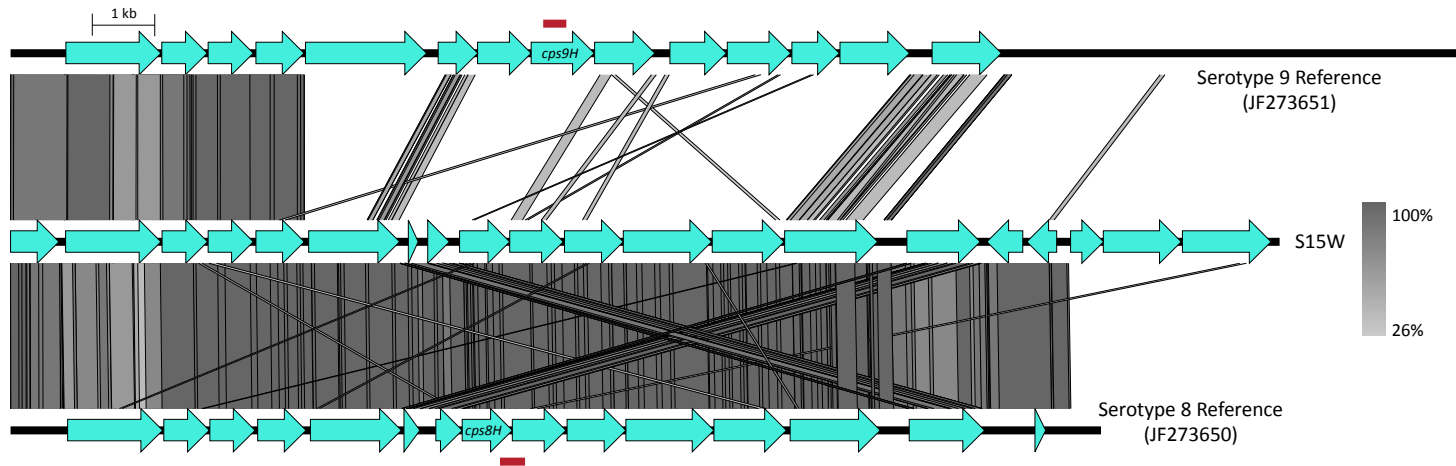

**Figure S16. Comparison of *cps* loci show that strain S15W is actually serotype 8, as identified by our pipeline.** Strain S15W had been typed as serotype 9 by serological methods. Short-read WGS data for strain S15W were downloaded from the Sequence Read Archive and *de novo* assembled using the A5 pipeline. The *cps* loci of a serotype 9 reference strain (top), strain S15W (middle) and a serotype 8 reference strain (bottom) were compared using the program easyFig. Serotype specific regions searched for by our pipeline are indicated in red. GenBank Accession numbers for reference sequences are provided.

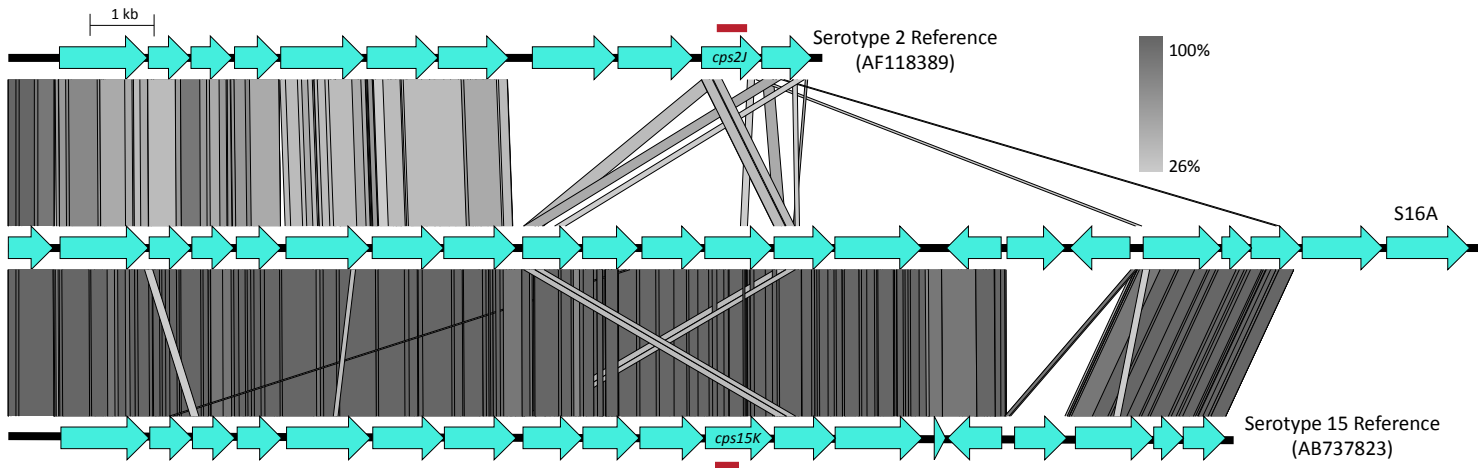

**Figure S17. Comparison of *cps* loci show that strain S16A is actually serotype 15, as identified by our pipeline.** Strain S16A had been typed as serotype 2 by serological methods. Short-read WGS data for strain S16A were downloaded from the Sequence Read Archive and *de novo* assembled using the A5 pipeline. The *cps* loci of a serotype 2 reference strain (top), strain S16A (middle) and a serotype 15 reference strain (bottom) were compared using the program easyFig. Serotype specific regions searched for by our pipeline are indicated in red. GenBank Accession numbers for reference sequences are provided.

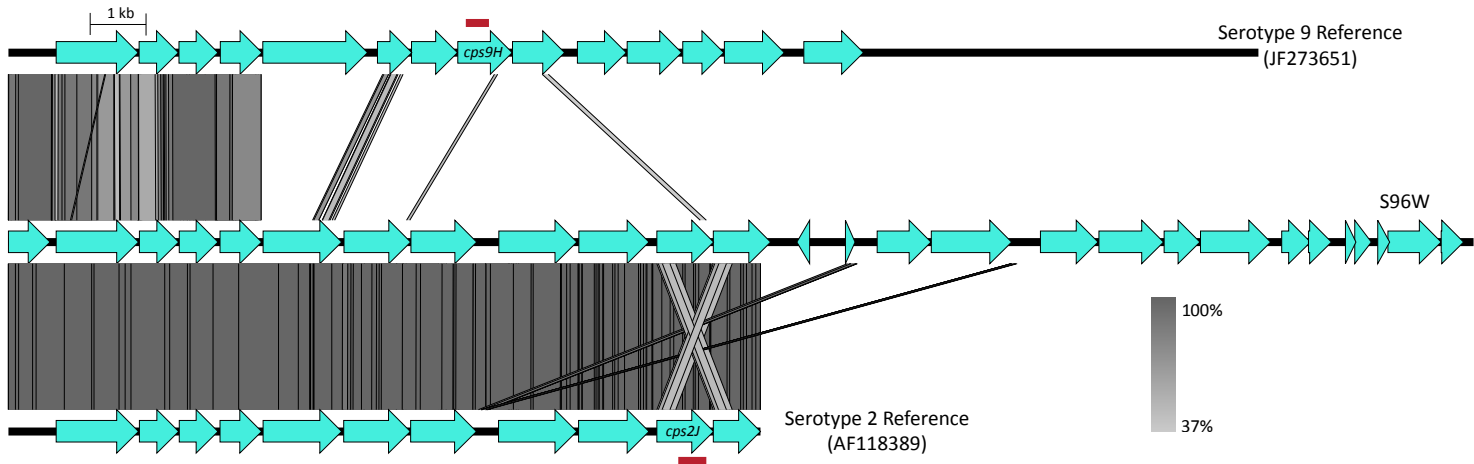

**Figure S18. Comparison of *cps* loci show that strain S96W is actually serotype 2, as identified by our pipeline.** Strain S96W had been typed as serotype 9 by serological methods. Short-read WGS data for strain S96W were downloaded from the Sequence Read Archive and *de novo* assembled using the A5 pipeline. The *cps* loci of a serotype 9 reference strain (top), strain S96W (middle) and a serotype 2 reference strain (bottom) were compared using the program easyFig. Serotype specific regions searched for by our pipeline are indicated in red. GenBank Accession numbers for reference sequences are provided.

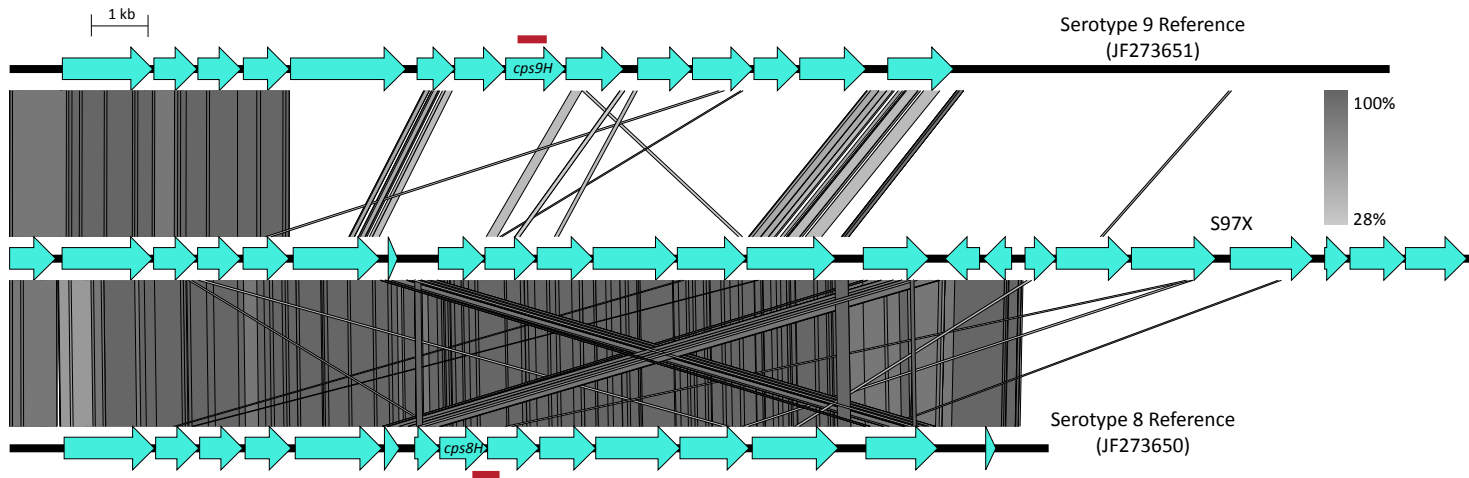

**Figure S19. Comparison of *cps* loci show that strain S97X is actually serotype 8, as identified by our pipeline.** Strain S97X had been typed as serotype 9 by serological methods. Short-read WGS data for strain S97X were downloaded from the Sequence Read Archive and *de novo* assembled using the A5 pipeline. The *cps* loci of a serotype 9 reference strain (top), strain S96W (middle) and a serotype 8 reference strain (bottom) were compared using the program easyFig. Serotype specific regions searched for by our pipeline are indicated in red. GenBank Accession numbers for reference sequences are provided.

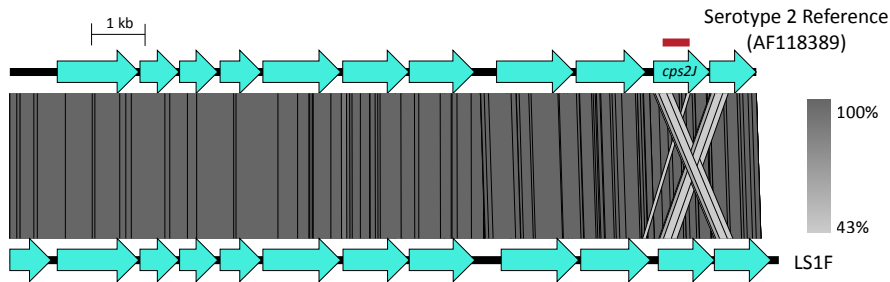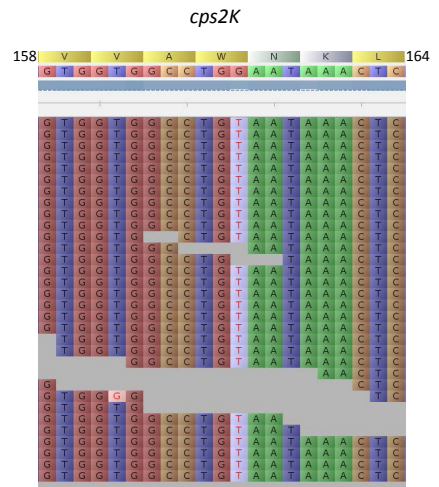

**Figure S20. Our pipeline predicts that strain LS1F is actually serotype 1/2.** Strain LS1F had been typed as serotype 2 by serological methods. Short-read WGS data for strain LS1F were downloaded from the Sequence Read Archive and *de novo* assembled using the A5 pipeline. The *cps* loci of a serotype 2 reference strain (top) and strain LS1F (bottom) were compared using the program easyFig, and showed a perfect match. However, short-read alignment to gene *cps2K* identified a single-nucleotide polymorphism (G483T, highlighted) in strain LS1F that we consistently associated with serotype 1/2 strains. Serotype specific regions searched for by our pipeline are indicated in red. GenBank Accession numbers for reference sequences are provided.



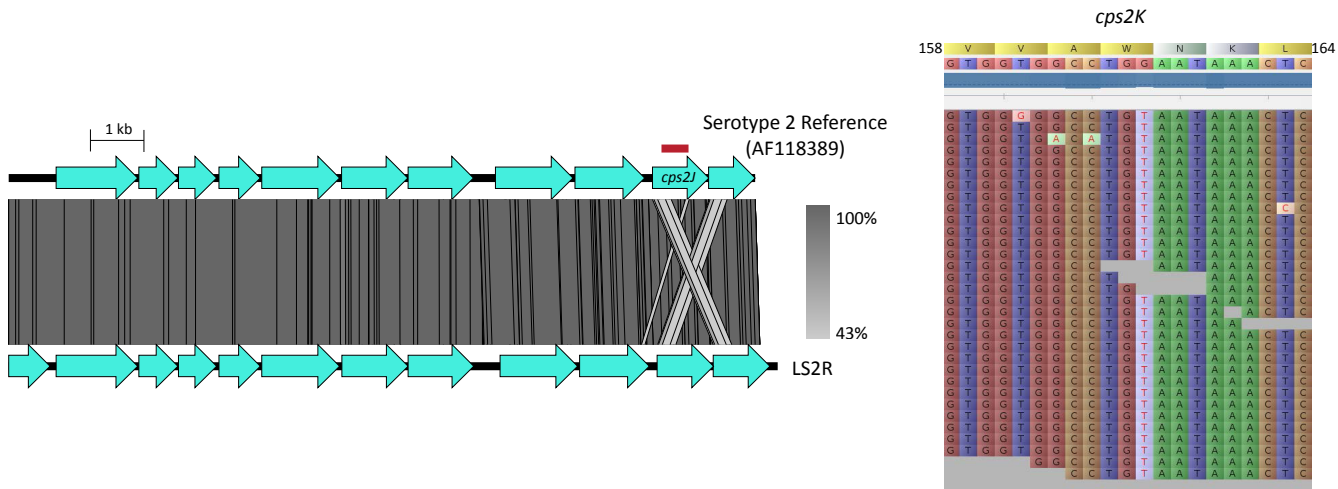

**Figure S22. Our pipeline predicts that strain LS2R is actually serotype 1/2.** Strain LS2R had been typed as serotype 2 by serological methods. Short-read WGS data for strain LS2R were downloaded from the Sequence Read Archive and *de novo* assembled using the A5 pipeline. The *cps* loci of a serotype 2 reference strain (top) and strain LS2R (bottom) were compared using the program easyFig, and showed a perfect match. However, short-read alignment to gene *cps2K* identified a single-nucleotide polymorphism (G483T, highlighted) in strain LS2R that we consistently associated with serotype 1/2 strains. Serotype specific regions searched for by our pipeline are indicated in red. GenBank Accession numbers for reference sequences are provided.

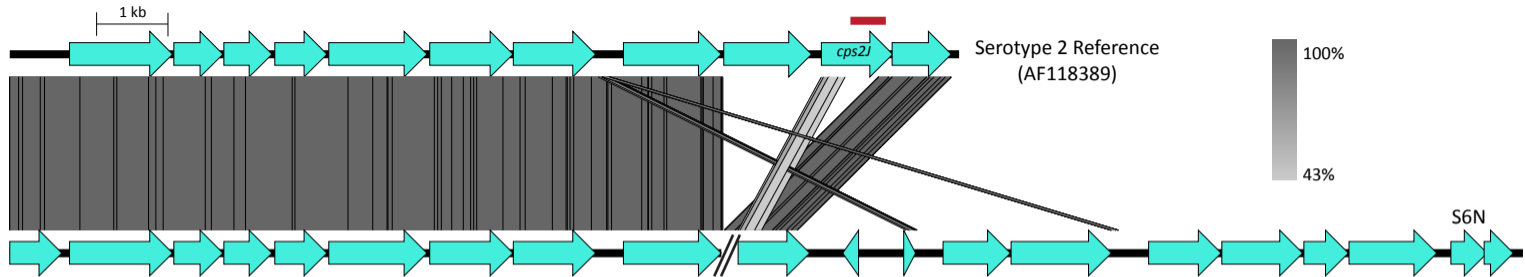

**Figure S23. Comparison of *cps* loci show that strain S6N is non-typable by our pipeline** Strain S6N had been typed as serotype 2 by serological methods. Short-read WGS data for strain LS6R were downloaded from the Sequence Read Archive and *de novo* assembled using the A5 pipeline. The *cps* loci of a serotype 2 reference strain (top), strain S6N (bottom) and 28 other reference strains (not shown) were compared using the program easyFig. We were unable to find sequences for genes *cpsI* and *cpsJ* in the *de novo* assemblies of strain S6N. Serotype specific regions searched for by our pipeline are indicated in red. GenBank Accession numbers for reference sequences are provided.



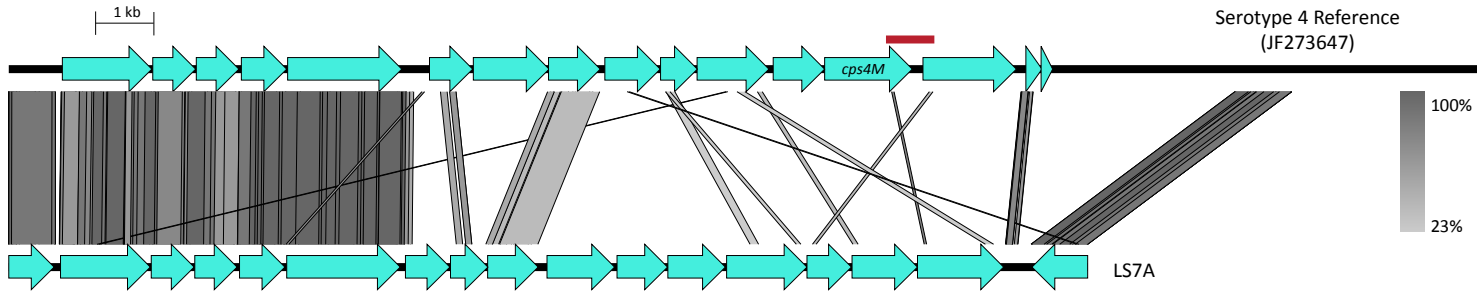

**Figure S24. Comparison of *cps* loci show that strain LS7A is actually non-typable.** Strain LS7A had been typed as serotype 4 by serological methods. Short-read WGS data for strain LS6R were downloaded from the Sequence Read Archive and *de novo* assembled using the A5 pipeline. The *cps* loci of a serotype 4 reference strain (top), strain LS7A (bottom) and 28 other reference strains (not shown) were compared using the program easyFig. Serotype specific regions searched for by our pipeline are indicated in red. GenBank Accession numbers for reference sequences are provided.

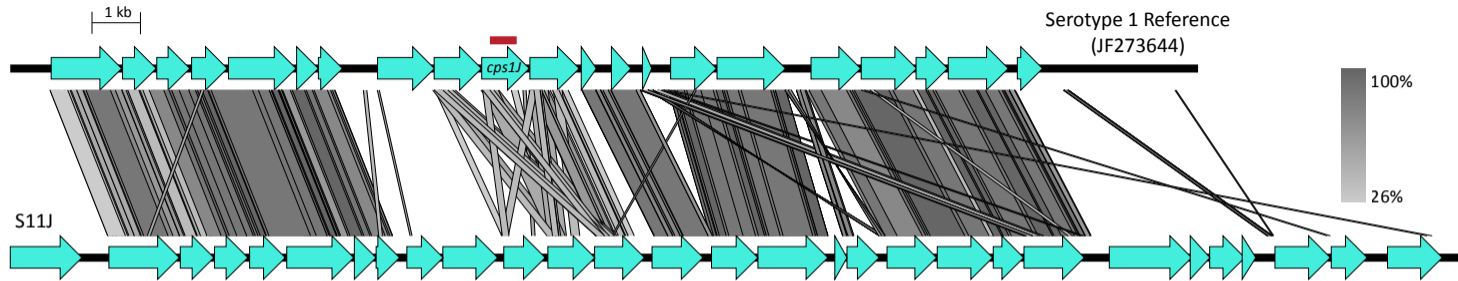

**Figure S25. Comparison of *cps* loci show that strain S11J is actually non-typable.** Strain S11J had been typed as serotype 1 by serological methods. Short-read WGS data for strain LS6R were downloaded from the Sequence Read Archive and *de novo* assembled using the A5 pipeline. The *cps* loci of a serotype 1 reference strain (top), strain S11J (bottom) and 28 other reference strains (not shown) were compared using the program easyFig. Serotype specific regions searched for by our pipeline are indicated in red. GenBank Accession numbers for reference sequences are provided.

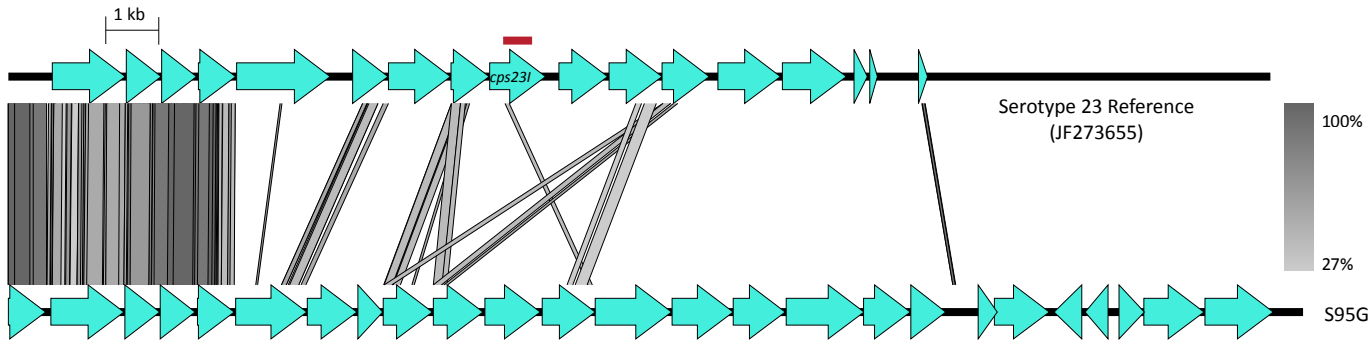

**Figure S26. Comparison of *cps* loci show that strain S95G is actually non-typable.** Strain S95G had been typed as serotype 23 by serological methods. Short-read WGS data for strain LS6R were downloaded from the Sequence Read Archive and *de novo* assembled using the A5 pipeline. The *cps* loci of a serotype 23 reference strain (top), strain S95G (bottom) and 28 other reference strains (not shown) were compared using the program easyFig. Serotype specific regions searched for by our pipeline are indicated in red. GenBank Accession numbers for reference sequences are provided.
